# Topographic Signatures of Global Object Perception in Human Visual Cortex\*

Susanne Stoll<sup>a,\*</sup>, Nonie J. Finlayson<sup>a,1</sup>, D. Samuel Schwarzkopf<sup>a,2</sup>

<sup>a</sup>*Experimental Psychology, University College London, 26 Bedford Way, London, WC1H 0AP, UK*

---

## Abstract

Our visual system readily groups dynamic fragmented input into global objects. How the brain represents such perceptual grouping remains however unclear. To address this question, we recorded brain responses using functional magnetic resonance imaging whilst observers perceived a dynamic bistable stimulus that could either be perceived *globally* (i.e., as a grouped and coherently moving shape) or *locally* (i.e., as ungrouped and incoherently moving elements). We further estimated population receptive fields and used these to back-project the brain activity during stimulus perception into visual space via a searchlight procedure. Global perception resulted in non-topographic suppression of responses in lower visual cortex accompanied by wide-spread enhancement in higher object-sensitive cortex. However, follow-up experiments indicated that higher object-sensitive cortex is suppressed if global perception lacks shape grouping, and that grouping-related suppression can be diffusely confined to stimulated sites once stimulus size is reduced. These results speak against a rigid *between-area* response amplitude code acting as a generic grouping mechanism and point to a *within-area* response amplitude code mediating the perception of figure and ground.

*Keywords:* Visual perceptual grouping, global object perception, population receptive field, searchlight back-projection, response amplitude code, visual space

---

---

\*Abbreviations: D, Diamond; ND, No-diamond; H, Horizontal; V, Vertical

\*Corresponding author

*Email address:* [stollsus@gmail.com](mailto:stollsus@gmail.com) (Susanne Stoll )

<sup>1</sup>Ipsos, Suite 3a, 201 Leichhardt Street Spring Hill, Brisbane, Queensland, 4000, Australia

<sup>2</sup>School of Optometry and Vision Science, The University of Auckland, 85 Park Road, Auckland, 1023, New Zealand

## 1. Introduction

Perceptual grouping binds together local image elements into global and coherent objects and segregates them from other objects in our visual field including the background (Houtkamp, 2011; Roelfsema, 2006). This enables object recognition and tracking even if visual input is fragmented across space and time (Anderson & Sinha, 1997; Anstis & Kim, 2011; Lorenceau & Shiffrar, 1992), such as when we perceive a vehicle passing behind a row of trees. However, despite its ubiquity in everyday life, it remains unclear how perceptual grouping is represented in the visual brain.

A plethora of studies in monkeys suggests that information about figure-ground organization is represented in lower and mid-tier visual areas. In particular, neurons in V1 and V4 respond more strongly to tilted elements belonging to a global shape as opposed to the background (Lamme, 1995; Poort et al., 2016, 2012). Likewise, V1 and V4 responses to elements grouped into contours are enhanced, whereas those to ungrouped background elements are suppressed (Chen et al., 2014; Gilad et al., 2013). Taken together, these findings indicate that the monkey visual system draws upon a *within-area* response amplitude code to mediate figure-ground segregation.

Do similar mechanisms exist in humans? Although a series of (early) functional magnetic resonance imaging (fMRI) studies addressed this question (e.g., Altmann et al., 2003; Scholte et al., 2008; Seghier et al., 2000), their analyses techniques often lacked the spatial sensitivity to quantify retinotopically-constrained response amplitude codes. More recently, however, Kok & de Lange (2014) combined standard fMRI recordings and population receptive field (pRF) modeling (Dumoulin & Wandell, 2008) to investigate the topographic profile of V1 and V2 activity to illusory Kanizsa shapes in much greater detail. When compared to non-illusory control stimuli, activity to Kanizsa shapes increased, whereas activity to the illusion-inducing elements decreased, while background activity remained unchanged. Another topographic fMRI study reported ground-suppression in V1 (and also V2) without figure-enhancement for structure-from-asynchrony textures vs unstructured control stimuli (Likova & Tyler, 2008). Thus, here too, a within-area response amplitude mechanism emerges in lower visual areas, distinctively labelling multiple objects including the background.

The interpretation of these and similar studies is, however, complicated by the fact that changes in perception always went hand in hand with changes in the physical properties of the stimulus. This makes it impossible to determine unequivocally the source of such activity modulations. Bistable stimuli, for which our perception alternates between two mutually exclusive states without changes in the physical properties of the stimulus, provide a way to circumvent this issue. A very elegant bistable stimulus that allows for the investigation of perceptual grouping mechanisms in dynamic occluded scenes – where object tracking is often required – has been

40 used by Fang et al. (2008) and Murray et al. (2002). In their studies, participants  
41 underwent fMRI while viewing a translating *diamond stimulus* whose corners were  
42 occluded by three bars of the same color as the background. This stimulus could ei-  
43 ther be perceived as four individual segments translating vertically out-of-phase and  
44 thus incoherently (*local, no-diamond* percept, Figure 1, A.) or as a diamond shape  
45 translating horizontally in-phase behind occluders and thus coherently (*global, dia-*  
46 *mond percept*; Figure 1, B., and Inline Supplementary Video 1). When participants  
47 experienced the global compared to the local percept, a striking pattern of results  
48 was observed: a reduction of activity in V1 (and also V2) accompanied by an increase  
49 of activity in the lateral-occipital complex (LOC) – a brain region known to respond  
50 more strongly to images of intact objects and shapes than a scrambled version thereof  
51 (e.g., Grill-Spector et al., 1998; Malach et al., 1995). Notably, this response pattern  
52 has recently been replicated (Grassi et al., 2018).

53 At first sight, such a *between-area* response amplitude mechanism reflects exactly  
54 the type of relationship proposed by *hierarchical predictive coding* models (e.g., Clark,  
55 2013; Mumford, 1992; Murray et al., 2004; Rao & Ballard, 1999). These models  
56 assume that lower visual areas flag an error whenever the predictive feedback from  
57 higher visual areas conflicts with the bottom-up input they receive. The general idea  
58 here is that when higher visual areas (e.g., the LOC) arrive at a global and coherent  
59 interpretation of a visual stimulus (e.g., the diamond shape behind occluders), the  
60 predictability of the bottom-up input is increased and thus the error signal attenuated.  
61 When the global diamond percept is then contrasted to the local no-diamond percept,  
62 a differential reduction of activity emerges in lower visual areas (e.g., V1).

63 As such, these models predict that the reduction in V1 activity for the global  
64 percept should be restricted to the retinotopic representation of the visible diamond  
65 segments (Figure 1, E. and F.). This prediction, however, seems difficult to reconcile  
66 with the finding that the suppressive effects in V1 for the diamond vs no-diamond per-  
67 cept extend well beyond stimulated sites (i.e., the visible diamond segments) into the  
68 remaining background region (Figure 1, C.; De-Wit et al., 2012). It is also incompati-  
69 ble with evidence showing that variations of the diamond stimulus result in increased  
70 (instead of decreased) V1 activity for the diamond vs the no-diamond percept (Caclin  
71 et al., 2012).

72 These discrepant results may be due to the coarse analyses techniques employed  
73 previously, precluding a more fine-grained inspection of topographic signatures under-  
74 lying the perception of the diamond stimulus. The possibility remains, for instance,  
75 that V1 activity corresponding to the region within the diamond frame (i.e., the cen-  
76 ter) and/or the invisible parts (i.e., the occluded corners) increases, whereas activity  
77 corresponding to the more peripheral background is suppressed during the diamond  
78 state (Figure 1, D.). De-Wit et al. (2012) considered much of these sub-areas as back-

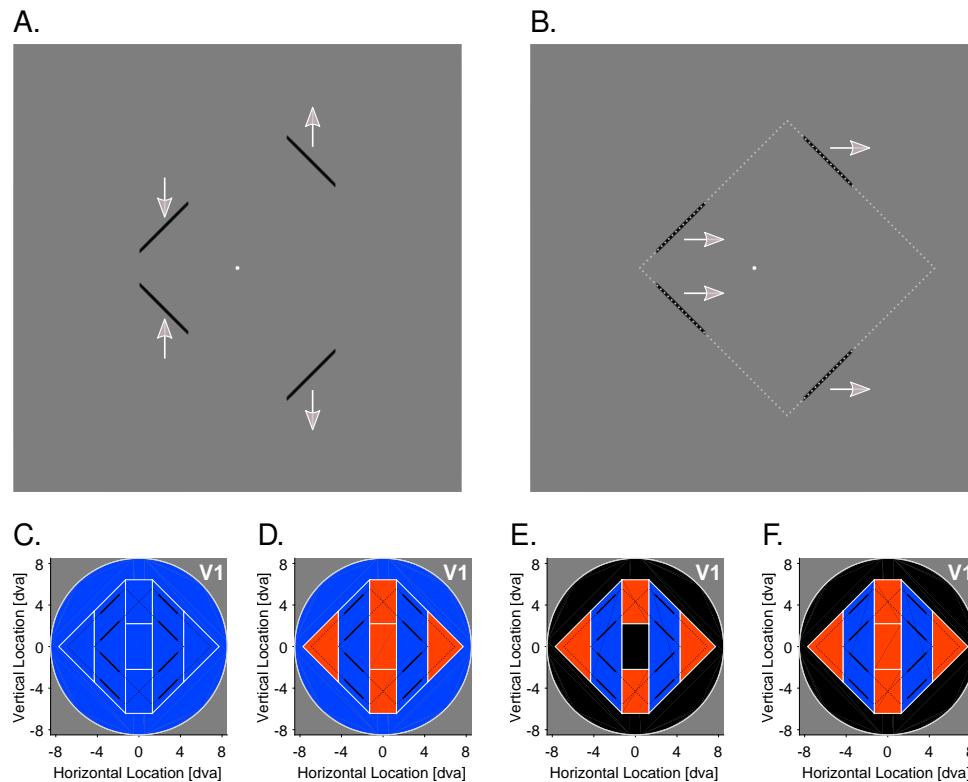

**Figure 1. Diamond experiment** | Example frames of the diamond stimulus and potential response amplitude profiles when the global percept is contrasted to the local one. **A.** Local, no-diamond percept. Here, the diamond stimulus was perceived as four individual segments oscillating vertically and incoherently with the segments on the left/right moving towards/away from one another, respectively, or vice versa (not shown). **B.** Global, diamond percept. Here, the four segments were grouped together and perceived as a diamond shape oscillating horizontally and coherently behind three occluders. The gray dashed frame denotes the inferred (but occluded) contours during the global state. The gray arrows indicate the perceived movement direction of the diamond stimulus. Only in the global state, the perceived and physical movement direction coincided. **C.** Previously suggested response amplitude profile. The whole visual field is suppressed. **D.** Hypothesized response amplitude profile. The segments and background region are suppressed whereas the corners and center regions are enhanced. **E.** Response amplitude profile when the segments, corners, and center region are predicted during the global state. The segments region is suppressed (due to a match between bottom-up input and higher-level feedback), the corners region enhanced (due to a mismatch between bottom-up input and higher-level feedback), and activity in the background and center region unchanged. **F.** The same as E., but if the whole diamond shape is predicted during the global state. The center region is now also enhanced. Black lines represent the extreme positions of the diamond stimulus. Black solid lines denote the visible ungrouped diamond segments (local, no-diamond percept). Black dashed lines additionally illustrate the inferred but invisible diamond shape when the segments were grouped together (global, diamond percept). White lines denote different visual field portions. Blue areas: Suppressive effects. Red areas: Enhancement effects. Black areas: No effect.

79 ground region, although the center and corners region could, arguably, be treated as  
80 figure and/or contour regions too. Although this hypothesis argues against hierar-  
81 chical predictive coding models (e.g., Mumford, 1992; Murray et al., 2004; Rao &  
82 Ballard, 1999) because there should be no activity modulations in the peripheral  
83 background region (Figure 1, E. and F.), it is compatible with the more general idea  
84 of a within-area response amplitude mechanism labeling different parts of a visual  
85 scene distinctively (e.g., Gilad et al., 2013; Kok & de Lange, 2014; Lamme, 1995). In-  
86 terestingly, such a response pattern has recently been observed for another dynamic  
87 bistable global-local stimulus (Grassi et al., 2017).

88 Here, we combined standard fMRI measurements and pRF modeling (similar to  
89 Kok & de Lange, 2014) to test for more fine-grained within-area and also between-  
90 area response amplitude mechanisms mediating global object perception. In a first  
91 experiment, we mapped the retinotopic organization of participants' cortices and es-  
92 timated the pRF of each voxel in visual cortex. In three further experiments, we  
93 recorded brain activity whilst participants viewed the diamond stimulus or a set of  
94 non-ambiguous stimuli with similar motion features but stable shape information to  
95 test for the generalizability of our findings. We then used each voxel's pRF to back-  
96 project the voxel-wise brain activity measured during stimulus perception into visual  
97 space via a searchlight procedure. This allowed us to directly read-out retinotopically-  
98 specific response amplitude codes along a large portion of the visual hierarchy.

## 99 **2. Retinotopic mapping experiment**

### 100 *2.1. Methods*

#### 101 *2.1.1. Participants*

102 All participants ( $N_{total} = 11$ ) of the three global object perception experiments  
103 took part in the retinotopic mapping experiment. We refer to these participants as  
104 P1-P11. They all had normal or corrected-to-normal visual acuity and gave written  
105 informed consent to partake in our experiments (see 3.1.1, 4.1.1, and 5.1.1 Partici-  
106 pants for more details). If participants took already part in the retinotopic mapping  
107 experiment in the scope of another study in our laboratory, we reused these data. All  
108 experimental procedures were approved by the University College London Research  
109 Ethics Committee.

#### 110 *2.1.2. Apparatus*

111 Functional and anatomical images were collected using a Siemens Avanto 1.5 Tesla  
112 magnetic resonance imaging (MRI) scanner. To prevent obstructed view, we used a  
113 customized version of the standard 32 channel coil, where the front visor was re-  
114 moved, reducing the number of channels to 30. For one participant (P2), however,  
115 the structural images were acquired with the standard 32 channel coil. Key presses

116 were recorded via an MRI-button box for right-handers. Stimuli were projected onto  
117 a screen (resolution:  $1920 \times 1080$  pixels; refresh rate: 60 Hz; background color: gray)  
118 at the back of the MRI scanner bore and viewed via a head-mounted mirror (view-  
119 ing distance: approximately 67-68 cm; stimulus dimensions are based on the latter  
120 value; note that the variance in exact head/eye position is typically greater than this  
121 range). A list of software and toolboxes used in all experiments can be found in  
122 Supplementary [Table S1](#).

### 123 *2.1.3. Stimuli*

124 The retinotopic mapping stimulus consisted of a simultaneous wedge-and-ring  
125 aperture ([Figure S1](#) and [Inline Supplementary Video 2](#)) centered within a screen-  
126 bounded rectangle in back-ground gray. The wedge aperture was a sector (polar  
127 angle:  $12^\circ$ ) of a disk (diameter: 17.03 dva), moving clockwise or counterclockwise in  
128 60 discrete steps during 1 cycle (1 step/s). Consecutive wedges overlapped by 50%.  
129 The ring aperture consisted of an expanding or contracting annulus whose diameters  
130 varied in 36 logarithmic steps during 1 cycle (1 step/s). The diameter of the inner  
131 circle (minimum: 0.48 dva) was 56-58% of that of the outer circle (maximum: 40.38  
132 dva, extending beyond the screen dimensions). The diameter of any current circle  
133 (outer or inner) was 10-11% larger/smaller compared to the previous one.

134 The wedge-and-ring aperture was superimposed onto circular images (diameter:  
135 17.03 dva) depicting intact natural and colorful scenes/objects or a phase-scrambled  
136 version thereof ( $N_{total} = 456$ ). The images and the wedge-and-ring aperture were cen-  
137 tered around a central black fixation dot (diameter: 0.13 dva) that was superimposed  
138 onto a central disk (diameter: 0.38 dva). Within the resulting annulus surrounding  
139 the fixation dot, the opacity level of the gray background increased radially inwards in  
140 12 equal steps (step size: 0.02 dva) from fully transparent ( $\alpha = 0\%$ ) to fully opaque  
141 ( $\alpha = 100\%$ ).

142 To support fixation compliance, a black polar grid (line width: 0.02 dva) at low  
143 opacity ( $\alpha = 10.2\%$ ) centered around the fixation dot was superimposed onto the  
144 screen. The polar grid consisted of 10 circles whose diameters were evenly spaced  
145 between 0.38 and 27.35 dva, and 12 radial lines evenly spaced between polar angles  
146 of  $0^\circ$  and  $330^\circ$ . The radial lines extended from an eccentricity of 0.13 to 15.14 dva.

### 147 *2.1.4. Procedure*

148 The retinotopic mapping experiment consisted of 3 runs. Excluding the initial  
149 dummy interval (10 s; fixation dot and polar grid only), each run comprised 4 blocks.  
150 At the beginning of each block, the wedge-and-ring aperture was presented (90 s;  
151 1.5 cycles of wedge rotation; 2.5 cycles of ring expansion/contraction), followed by a  
152 fixation interval (30 s; fixation dot and polar grid only).

153 The order of wedge and ring movement in each run was clockwise and expanding  
154 (block 1), clockwise and contracting (block 2), counterclockwise and expanding (block  
155 3), or counterclockwise and contracting (block 4). Within each block, the type of  
156 carrier image (intact or phase-scrambled) alternated every 15 s with the first carrier  
157 image always being phase-scrambled in odd-numbered blocks and intact in even-  
158 numbered blocks. The carrier images themselves were switched every 500 ms and  
159 displayed 1-2 times in pseudorandomized order during each run. To avoid confounds  
160 due to the spatial distribution of low-level features, the images were always rotated  
161 with the orientation of the wedge aperture.

162 Participants had to fixate the fixation dot continuously and press a key whenever  
163 the dot turned red. Every 200 ms, with a probability of 0.03, the fixation dot under-  
164 went a randomized change in color for 200 ms (from black to red, green, blue, cyan,  
165 magenta, yellow, white, or remaining black). To also ensure attention on the wedge-  
166 and-ring aperture, participants were required to press a key whenever a Tartan image  
167 appeared. Due to technical issues, for one participant (P3), the last 10 volumes (part  
168 of the final 30 s fixation interval) were not acquired in one run. To account for this,  
169 we also eliminated the last 10 volumes in the remaining two runs for this participant  
170 before submitting the functional data to our preprocessing procedure.

#### 171 *2.1.5. MRI acquisition*

172 Functional images were acquired with a T2\*-weighted multiband 2D echo-planar  
173 imaging sequence (Breuer et al., 2005) from 36 transverse slices centered on the oc-  
174 cipital cortex (repetition time, TR = 1 s, echo time, TE = 55 ms, voxel size = 2.3  
175 mm isotropic, flip angle = 75°, field of view, FoV = 224 mm × 224 mm, no gap,  
176 matrix size: 96 × 96, acceleration = 4). Slices were oriented to be approximately par-  
177 allel to the calcarine sulcus while ensuring adequate coverage of the ventral occipital  
178 and inferior parietal cortex. Anatomical images were acquired with a T1-weighted  
179 magnetization-prepared rapid acquisition with gradient echo (MPRAGE) sequence  
180 (TR = 2.73 s, TE = 3.57 ms, voxel size = 1 mm isotropic, flip angle = 7°, FoV = 256  
181 mm × 224 mm, matrix size = 256 × 224, 176 sagittal slices).

#### 182 *2.1.6. Preprocessing*

183 After removing the first 10 volumes of each run to allow for T1-related signals to  
184 reach equilibrium, functional images were bias-corrected for intensity inhomogeneity,  
185 realigned, unwarped, and coregistered to the anatomical image. The anatomical image  
186 was used to construct a surface model, onto which the preprocessed functional data  
187 were projected. For each vertex in the surface mesh, we created an fMRI time series  
188 in each run by identifying the voxel in the functional images that fell half-way between  
189 the vertex coordinates in the gray-white matter and the pial surface. Finally, each  
190 time series was linearly detrended and  $z$ -standardized.

191 *2.1.7. Data analysis*

192 *PRF estimation.* The preprocessed time series for each vertex were averaged across  
193 runs. To estimate the pRF for each vertex, we then implemented a forward-modeling  
194 approach restricted to the posterior third of the cortex. Each pRF was modeled as  
195 a 2D isotropic Gaussian with four free parameters:  $x$ ,  $y$ ,  $\sigma$ , and  $\beta$ , where  $x$  and  $y$   
196 denote the pRF center position in Cartesian coordinates relative to fixation,  $\sigma$  the  
197 size of the pRF, and  $\beta$  the amplitude of the signal. The pRF center position and  
198 size were expressed in dva. The estimation procedure was identical to our previous  
199 studies (Moutsiana et al., 2016; van Dijk et al., 2016). The resulting parameter maps  
200 were modestly smoothed with a spherical Gaussian kernel (FWHM = 3 mm; for  
201 experiment-specific smoothing procedures of pRF and response data, see 3.1.7 Data  
202 analysis). Note that vertices with a very poor goodness-of-fit ( $R^2 \leq .01$ ) were removed  
203 prior to smoothing.

204 *Delineation of visual areas.* Using the smoothed color-coded maps for eccentricity  
205 and polar angle projected onto the surface model of each hemisphere, we manually  
206 delineated V1-V3, V3A, V3B, LO-1, LO-2 (see all Wandell et al., 2007), V4, VO-  
207 1, and VO-2 (see all Winawer & Witthoft, 2015). Polar angle reversals served as  
208 primary indicator for identifying boundaries between visual areas (Engel et al., 1997;  
209 Sereno et al., 1995). Example maps used for back-projection purposes (see 3.1.7 Data  
210 analysis) including all delineations can be found in Supplementary Figure S1 (C. and  
211 D.).

212 For all data analyses, the quarterfield delineations of each hemisphere were merged  
213 and areas V3B, LO-1, LO-2, VO-1, and VO-2 combined into a larger complex we la-  
214 bel the *ventral-lateral occipital complex* (VLOC). These sub-areas tended to show  
215 increased activation for intact vs phase-scrambled images (Supplementary Figure S1,  
216 E.), ensuring the functional validity of the VLOC as an object-sensitive complex. To  
217 this end, we performed a voxel-wise general linear model (GLM) for each partici-  
218 pant on the preprocessed fMRI data from the retinotopic mapping experiment. The  
219 GLM comprised a constant boxcar regressor for each carrier type (intact vs phase-  
220 scrambled), convolved with a canonical hemodynamic response function. The fixation  
221 intervals were modeled implicitly and the obtained realignment estimates used as nui-  
222 sance repressors. We applied Restricted Maximum Likelihood estimation with a first  
223 order autoregressive model, a high-pass filter (HPF) of 155 s, and implicit masking  
224 (threshold: 0.8). The voxel-wise differential beta values resulting from the GLM were  
225 then projected onto the surface model and smoothed moderately with a spherical  
226 Gaussian kernel (FWHM = 3 mm). Note that values flagged by implicit masking  
227 were discarded from smoothing and any subsequent visualizations. Similar functional  
228 localization procedures were applied previously to localize the LOC (e.g., De-Wit  
229 et al., 2012; Fang et al., 2008; Grill-Spector et al., 1998), which does typically not



230 fully include the VO subareas and is not based on retinotopic principles. We thus  
231 refrained from labeling our complex ‘LOC’.

232 Importantly, compared to V1-V3, the subareas of the VLOC are smaller with  
233 fewer vertices and a sparser distribution of pRFs around the vertical meridian and  
234 the peripheral visual field (Amano et al., 2009; Larsson & Heeger, 2006). Combining  
235 these areas into the VLOC thus ensured a more complete coverage of the visual field  
236 in each participant, which was the basis for subsequent data analyses.

### 237 **3. Diamond experiment**

#### 238 *3.1. Methods*

##### 239 *3.1.1. Participants*

240 Five healthy participants (P1-P5; 1 male; age range: 20-37 years; all right-handed),  
241 including the authors DSS and SS, took part in the diamond experiment.

##### 242 *3.1.2. Apparatus*

243 Apart from the apparatus of the retinotopic mapping experiment, we used an  
244 EyeLink 1000 MRI compatible eye tracker system to record eye movement data of  
245 participants’ left eye.

##### 246 *3.1.3. Stimuli*

247 The bistable diamond stimulus (similar to De-Wit et al., 2012; Fang et al., 2008)  
248 comprised a black rhombus-shaped frame (size:  $7.92 \times 7.92$  dva; line width: 0.16)  
249 located around a white central fixation dot (diameter: 0.16 dva). Three vertical rect-  
250 angles displayed in background color occluded the corners of the diamond stimulus.  
251 The middle rectangle (size:  $3.75 \times 17.03$  dva) was centered around the fixation dot.  
252 The left and right rectangles (size:  $22.84 \times 17.03$  dva, respectively) were centered  
253 vertically with their vertical line of symmetry coinciding with the left and right edges  
254 of the screen, so that the visible segments of the diamond had a length of 2.61 dva.  
255 When the diamond stimulus was centered around fixation, its corners were located at  
256 5.6 dva eccentricity. The movement of the diamond followed a horizontal sine wave  
257 ( $A = 1.29$  dva,  $f = 0.5$  Hz,  $\omega = 3.14$ ,  $\phi = 0$ ).

258 The diamond display evoked two alternating and mutually exclusive perceptual  
259 states: a *local* percept of four individual segments translating vertically out-of-phase  
260 and thus incoherently (*no-diamond*; Figure 1, A.) or a *global* percept of an inferred  
261 diamond shape translating horizontally in-phase behind three occluders and thus co-  
262 herently (*diamond*; see all Figure 1, B., and Supplementary Video 1).

#### 263 3.1.4. Procedure

264 The diamond experiment comprised 1 practice run (not analyzed) and 5 experi-  
265 mental runs. Experimental runs started with a background-only dummy interval (10  
266 s). Next, an initial fixation interval (15 s) was presented, followed by the diamond  
267 display (400 s) and a final fixation interval (15 s). Except for the dummy interval,  
268 the fixation dot was continuously presented.

269 Participants were required to fixate the fixation dot continuously. During the  
270 diamond interval, they indicated their current percept via pressing a key assigned to  
271 their right index finger (diamond) or right middle finger (no-diamond). Except for  
272 the first percept in any given run, participants had to indicate perceptual switches  
273 only, but were allowed to press any key again if they lost track. During each run,  
274 participants' eye position and pupil size were recorded at 60 Hz. Prior to scanning,  
275 all participants were tested behaviorally in a separate session outside the scanner to  
276 ensure they could clearly perceive both perceptual states and spent a roughly equal  
277 amount of time in either. Three recruited participants were unable to do so and hence  
278 replaced.

#### 279 3.1.5. MRI acquisition

280 Functional images were acquired with the same sequence as in the retinotopic  
281 mapping experiment.

#### 282 3.1.6. Preprocessing

283 The preprocessing was identical to the retinotopic mapping experiment using the  
284 same structural image.

#### 285 3.1.7. Data analysis

286 *Searchlight back-projection.* To explore intra- and also between-area response ampli-  
287 tude mechanisms, we first performed a voxel-wise GLM on the preprocessed data  
288 (HPF: 128 s). We used a variable epoch boxcar regressor (Grinband et al., 2008) for  
289 each perceptual state (diamond or no-diamond) as well as the period from the onset  
290 of the diamond display until participants' first key press. The variable epochs for  
291 each perceptual state were the same as in the analysis of perceptual durations (see  
292 Supplementary material, 1.1.1 Data analysis). In all other respects (e.g. estimation  
293 procedure and nuisance regressors), the GLM was identical to the one specified for  
294 the retinotopic mapping experiment.

295 We computed the following contrasts of interest: *diamond vs fixation*, *no-diamond*  
296 *vs fixation*, and *diamond vs no-diamond*. The first two contrasts allowed us to verify  
297 the validity of our searchlight back-projection approach. Based on previous research  
298 on the positive and negative BOLD signal (Fracasso et al., 2018; Goense et al., 2012;  
299 Shmuel et al., 2002, 2006), we expected an increase of activity in the area within

300 which the visible diamond segments moved and a decrease in non-stimulated sites,  
301 especially in lower visual areas (V1/V2), where pRF size is small (e.g., Alvarez et al.,  
302 2015; Amano et al., 2009; Dumoulin & Wandell, 2008; van Dijk et al., 2016). The  
303 contrast diamond vs no-diamond corresponded to analyses applied in prior studies  
304 involving the diamond stimulus (e.g., De-Wit et al., 2012; Fang et al., 2008). Based  
305 on the study by Fang et al. (2008) and De-Wit et al. (2012), we expected decreased  
306 activity in the area within which the diamond segments moved. However, we had  
307 no clear expectations as to how the remaining visual field would behave due to the  
308 coarser analyses techniques applied previously (De-Wit et al., 2012), evidence from  
309 figure-ground studies (Chen et al., 2014; Gilad et al., 2013; Gilad & Slovlin, 2015;  
310 Kok & de Lange, 2014; Lamme, 1995; Poort et al., 2012, 2016), and findings showing  
311 increased activity for the diamond vs no-diamond percept (Caclin et al., 2012).

312 The voxel-wise differential beta values from the GLM were subsequently projected  
313 onto the surface model. Both the raw pRF data and the differential beta estimates  
314 were then modestly smoothed in an identical fashion using a spherical Gaussian kernel  
315 (FWHM = 3 mm). Vertices whose pRF estimates showed a very poor goodness-of-fit  
316 ( $R^2 \leq .01$ ) or artifacts ( $\sigma$  or  $\beta \leq 0$ ) were removed prior to smoothing. Vertices flagged  
317 by implicit masking were likewise discarded from smoothing as well as any subsequent  
318 analyses. We then used the delineations for each visual area and hemisphere from  
319 the retinotopic mapping experiment to extract pRF estimates and differential beta  
320 estimates of vertices falling within their spatial extent and pooled them across hemi-  
321 spheres for each participant. Vertices whose pRF estimates showed poor goodness-of-  
322 fit ( $R^2 \leq .05$ ), and/or eccentricities outside the stimulated retinotopic mapping area  
323 ( $\geq 8.5$  dva) were discarded.

324 Subsequently, we defined a mesh grid (size:  $17 \times 17$  dva) covering the stimulated  
325 retinotopic mapping area. The grid point coordinates were separated from one an-  
326 other by 0.1 dva in both the horizontal and vertical dimension (range: -8.5-8.5 dva,  
327 respectively). Next, a circular searchlight (radius: 1 dva) was passed through visual  
328 space by translating its center point from one grid point to the next. All vertices whose  
329 pRF center position fell into a given searchlight at a particular location were then  
330 identified. The differential beta estimates corresponding to the set of vertices within  
331 a given searchlight were summarized as a  $t$ -statistic by performing a one-sample  $t$ -test  
332 against 0. This way, we were able to account for the different numbers of vertices  
333 in each searchlight.  $T$ -statistics based on a single vertex/no vertices were set to 0.  
334 Importantly,  $t$ -statistics were only used as descriptive measure here. Of note, this  
335 searchlight procedure automatically normalizes the input data into a standard space  
336 as defined by the mesh grid.

337 For the vertices within a given searchlight, we derived the inverse Euclidean dis-  
338 tance of their pRF center position from the respective searchlight center, normalized

339 by the searchlight radius. These normalized vertex-wise weights were summed up  
340 searchlight-wise, resulting in summary weights where higher values reflect a higher  
341 number of vertices within a given searchlight as well as vertices with a pRF center po-  
342 sition closer to the searchlight center. The summary weights were then normalized via  
343 dividing them by the 25<sup>th</sup> percentile of the resulting distribution of summary weights.  
344 Normalized summary weights  $> 1$  were set to 1. Summary weights based on a single  
345 vertex were set to 0. Using the grid point coordinates, the resulting  $t$ -statistic maps  
346 were visualized as a heatmap. The color saturation of the heatmap was calibrated  
347 using the normalized summary weights, so that a higher saturation reflected a higher  
348 normalized summary weight.

349 The searchlight back-projections were obtained for each visual area and contrast of  
350 interest by pooling the data from all participants (after participant-wise smoothing).  
351 The pooling of data across participants improved the precision of searchlight back-  
352 projections because vertices from different participants complemented one another  
353 and covered the visual field more completely. Due to insufficient visual field coverage  
354 in V3A and V4 in each participant, we excluded these areas from the searchlight and  
355 all subsequent analyses.

356 *Representational similarity analysis of searchlight back-projections.* To explore the  
357 impact of each participant's data set on the pooled searchlight back-projections, we  
358 performed a representational similarity analysis (Kriegeskorte, 2008). To this end,  
359 we first conducted a leave-one-subject-out (LOSO) analysis by repeating the search-  
360 light back-projections analysis whilst iteratively leaving out one participant. We then  
361 determined the dissimilarity (1-Spearman correlation) between the LOSO and the  
362 pooled back-projection matrices. Moreover, to assess the similarity structure more  
363 comprehensively, we also determined the dissimilarity between the individual (i.e.,  
364 participant-wise) and the LOSO or pooled back-projections matrices. Importantly,  
365 for each back-projection pair,  $t$ -statistics based on a single vertex/no vertices were  
366 removed from both matrices prior to calculating the dissimilarity measure.

367 To visually summarize the dissimilarity structure, the resulting square matrices  
368 of dissimilarities (with zeros along the diagonal) were projected onto a 2D ordination  
369 space via Kruskal's (1964a; 1964b) non-metric multidimensional scaling (NMDS)  
370 using monotone regression (criterion: stress). The final solution (based on 100 random  
371 starts) was centered, rotated via principal component analysis, and scaled to the range  
372 of the input dissimilarity measures. The lower the dissimilarity between two back-  
373 projection matrices, the closer they should be located in the 2D ordination space.  
374 Accordingly, if the pooled back-projections are representative of the whole study  
375 sample, the LOSO and individual back-projections should tightly cluster around or  
376 coincide with them.

377 *3.2. Results*

378 *3.2.1. Searchlight back-projections*

379 [Figure 2](#) depicts the searchlight back-projections for the pooled data per visual  
380 area and contrast of interest. When comparing the diamond or no-diamond percept  
381 to fixation, activity increased in the area within which the visible diamond segments  
382 moved. This pattern was fairly focal in V1 with suppressed differential activity in  
383 non-stimulated sites, but became more diffuse in V2, V3, and the VLOC.

384 For the contrast diamond vs no-diamond, we observed a wide-spread suppression  
385 of activity in V1, particularly along the horizontal meridian. Although V2 and V3  
386 showed similar suppressive effects, these were less extensive and intermixed with dis-  
387 tinct opposite effects. There was also no clear indication of a suppression streak along  
388 the horizontal meridian. Finally, unlike V1-V3, the contrast diamond vs no-diamond  
389 showed a wide-spread increase of activity in the VLOC.

390 *3.2.2. Representational similarity of searchlight back-projections*

391 [Figure 3](#) depicts the NMDS solution for dissimilarities calculated between the in-  
392 dividual, pooled, and LOSO searchlight back-projections, separately for each contrast  
393 of interest and visual area. The corresponding representational dissimilarity matrices  
394 can be found in Supplementary [Figure S3](#).

395 For all visual areas and contrasts, the LOSO back-projections essentially coincided  
396 with the pooled back-projections, highlighting a low degree of dissimilarity. Thus, the  
397 pooled back-projections do not seem to be driven by a single participant. The individ-  
398 ual back-projections clustered around the pooled ones in a circular fashion, but less  
399 tightly than the LOSO back-projections, suggesting a higher degree of dissimilarity.  
400 Strikingly, for the contrast diamond vs no-diamond in V1 and V2, the back-projection  
401 pattern for P5 was located far away from the remaining ones, indicating a high degree  
402 of dissimilarity (see all [Figure 3](#)). Indeed, when examining the representational dis-  
403 similarity matrices directly ([Figure S3](#)), it becomes evident that the back-projections  
404 for P5 in V1 and V2 show a pattern opposite to the other participants.

405 *3.3. Discussion*

406 Here, we explored within- and between-area response amplitude codes in human  
407 visual cortex underlying global object perception. Participants viewed a bistable dia-  
408 mond stimulus that was either perceived as four individual segments moving vertically  
409 and incoherently (local, no-diamond percept) or a diamond shape drifting horizontally  
410 and coherently behind occluders (global, diamond percept).

411 When contrasting either the diamond or no-diamond percept to fixation, our  
412 searchlight back-projections revealed enhanced activity in cortical sites stimulated  
413 by the visible diamond segments. This differential increase was concise in V1 along  
414 with reduced activity in non-stimulated sites, but became more widespread in V2,

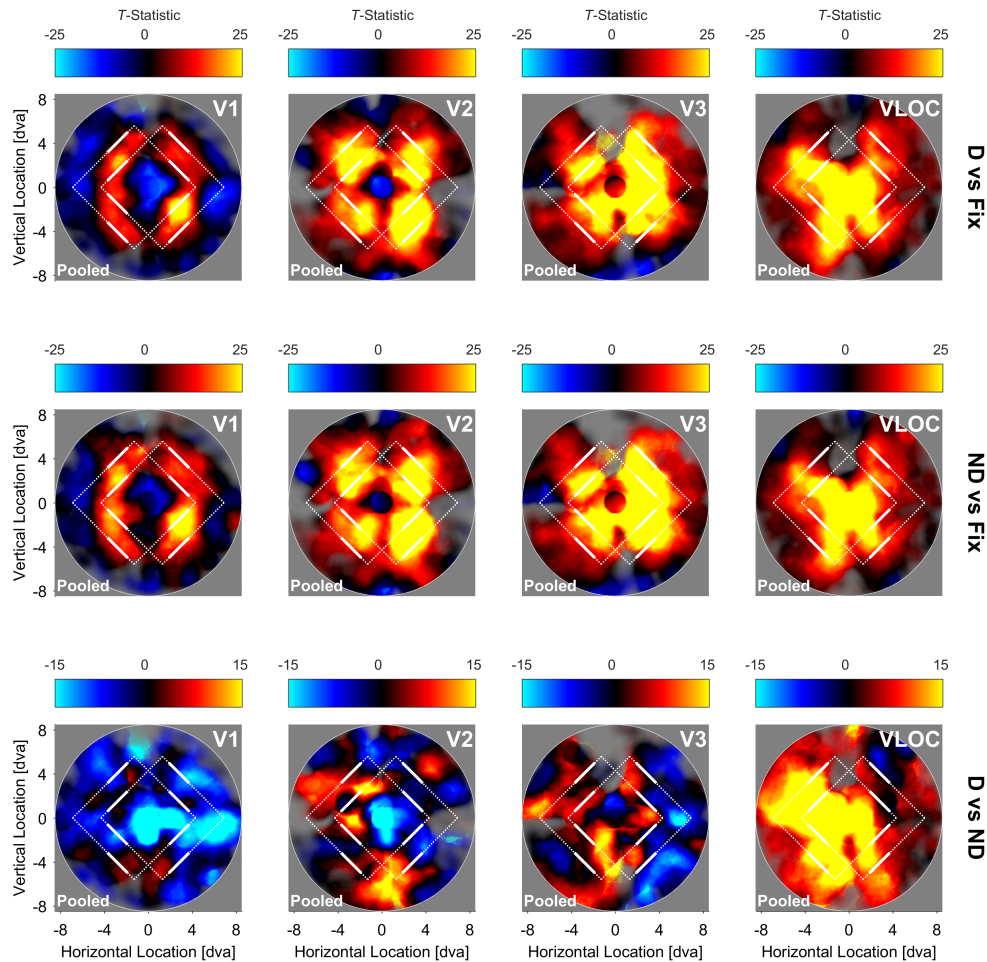

**Figure 2. Diamond experiment** Searchlight back-projections of differential brain activity as a function of contrast of interest and visual area.  $T$ -statistics surpassing a value of  $\pm 25$  (first and second row) or  $\pm 15$  (third row) were set to that value. The saturation of colors reflects the number of vertices in a given searchlight plus their inverse distance from the searchlight center. White lines represent the extreme positions of the diamond stimulus. White solid lines denote the visible ungrouped diamond segments. White dashed lines additionally illustrate the inferred but invisible diamond shape when the segments were grouped together. D = Global, diamond percept. ND = Local, no-diamond percept. Fix = Fixation baseline. VLOC = Ventral-and-lateral occipital complex. Pooled = Data pooled across all 5 participants.

415 V3, and the VLOC. We therefore replicate previous work on stimulus-evoked retino-  
 416 topic activation and background suppression in visual cortex (Fracasso et al., 2018;  
 417 Goense et al., 2012; Shmuel et al., 2002, 2006). Our findings furthermore comply

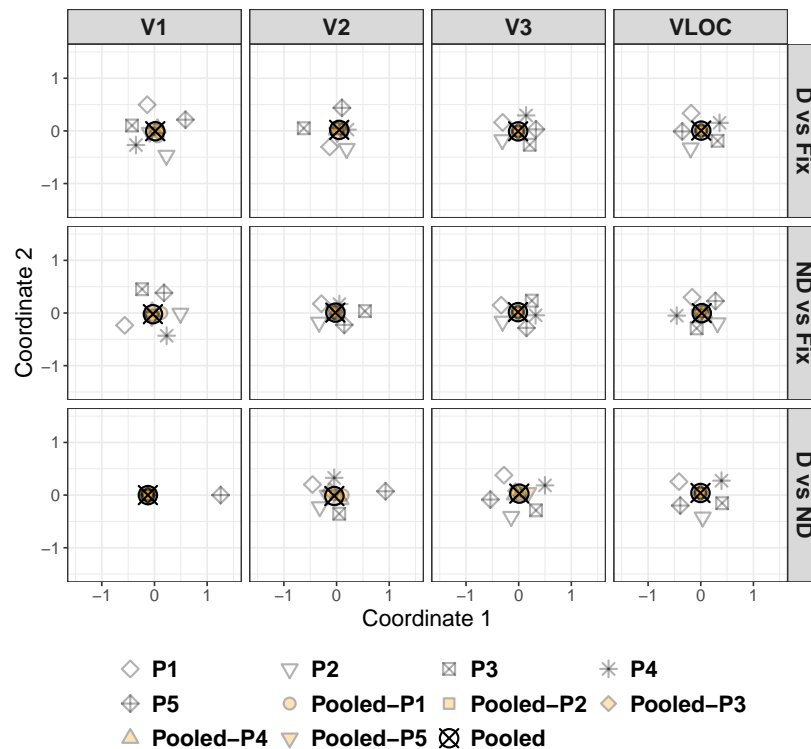

**Figure 3. Diamond experiment** | Non-metric multi-dimensional scaling of the dissimilarities from Figure S3 as a function of contrast of interest and visual area. D = Global, diamond percept. ND = Local, no-diamond percept. Fix = Fixation baseline. VLOC = Ventral-and-lateral occipital complex. P1-P5 = Participant 1-5. Pooled = Data pooled across all 5 participants. Pooled-P1-Pooled-P5 = Data pooled across 4 participants with 1 participant left out (as indicated by the suffix). LOSO = Leave-one-subject-out.

418 with predictions based on between-area differences in pRF size (Alvarez et al., 2015;  
 419 Amano et al., 2009; Dumoulin & Wandell, 2008; van Dijk et al., 2016). Specifically,  
 420 given that pRF size is larger in higher visual areas, there is a greater number of pe-  
 421 ripherally located pRFs encoding the visible diamond segments, resulting in a more  
 422 diffuse topographic representation. In sum, these results confirm our expectations  
 423 and validate our searchlight back-projection approach.

424 When we directly compared the diamond to the no-diamond percept, our search-  
 425 light analysis indicated a large-scale suppression of activity in V1 along with tenden-  
 426 tially less extensive suppressive effects in V2 and V3. This global dampening effect  
 427 speaks against the idea of a within-area response amplitude mechanism labelling dif-  
 428 ferent portions of the diamond display distinctively to mediate global object percep-  
 429 tion (Chen et al., 2014; Gilad et al., 2013; Gilad & Slovlin, 2015; Grassi et al., 2017;  
 430 Kok & de Lange, 2014; Lamme, 1995; Likova & Tyler, 2008; Poort et al., 2012, 2016).

431 Critically, however, it echoes prior reports of retinotopically-unspecific deactivation  
432 during the diamond vs no-diamond percept and an attenuation of these effects in  
433 V2/V3 (De-Wit et al., 2012).

434 In contrast, there was a wide-spread enhancement of activity in the VLOC for the  
435 diamond compared to the no-diamond percept. This mirrors previous studies on the  
436 diamond stimulus identifying the LOC as a source for modulatory feedback in lower  
437 visual areas (Fang et al., 2008; Murray et al., 2002). This idea is corroborated by  
438 a large body of work highlighting the sensitivity of LOC responses to global shape  
439 and intact objects even under occlusion conditions (Grill-Spector et al., 1999; Hegdé  
440 et al., 2008; Lerner et al., 2002, 2004; Malach et al., 1995; Vinberg & Grill-Spector,  
441 2008). Moreover, given that visual stimulation was identical in the diamond and no-  
442 diamond percept, the universal deactivation we observed in lower visual cortex cannot  
443 be attributed to physical stimulus differences (Dumoulin & Hess, 2006) and was thus  
444 likely subject to top-down modulation.

445 However, it is unclear whether the inverse relationship between the VLOC/LOC  
446 and lower visual cortex we and others quantified (Fang et al., 2008; Grassi et al., 2018;  
447 Murray et al., 2002) can be regarded as a generic perceptual grouping mechanism oper-  
448 ating irrespective of shape perception. Recent evidence suggests, for instance, that  
449 activity in the LOC also decreases for intact vs scattered objects with abolished inter-  
450 part relations (Margalit et al., 2017) as it is the case during the no-diamond percept.  
451 In order to address this question, our third experiment used a non-ambiguous stim-  
452 ulus consisting of four circular apertures, each carrying a random dot kinematogram  
453 (RDK). In the local condition, the RDKs translated vertically and incoherently. In  
454 the global condition, however, they moved horizontally and coherently and could thus  
455 be grouped together without forming a hybrid shape. These conditions closely echoed  
456 the motion features of the diamond stimulus whilst keeping shape information (i.e.,  
457 the four circular apertures) constant and allowing for perceptual grouping. If the  
458 between-area response amplitude mechanism between the VLOC/LOC and lower vi-  
459 sual cortex indeed constitutes a generic grouping mechanism, we should be able to  
460 conceptually replicate the findings from our diamond experiment.

## 461 **4. Dots experiment**

### 462 *4.1. Methods*

#### 463 *4.1.1. Participants*

464 The authors DSS and SS as well as 3 other healthy participants (P1, P2 and  
465 P6-P8; 1 male; age range: 24-38 years; 1 left-handed) partook in this experiment.



466 *4.1.2. Apparatus*

467 All apparatus were identical to the diamond experiment although the viewing  
468 distance to the head-mounted mirror was approximately 67 cm here as this facilitated  
469 the use of the eye tracker.

470 *4.1.3. Stimuli*

471 The dots stimulus comprised four circular apertures through which a random dot  
472 kinematogram (RDK), that is, a field (size:  $2.85 \times 2.85$  dva) of moving black dots  
473 (diameter: 0.11 dva) was presented. The apertures were generated by removing all  
474 dots falling outside or on the edge of a circle (diameter: 2.85 dva) centered within the  
475 dots field. The aperture centers were positioned at the corners of a square (size:  $5.69$   
476  $\times 5.69$  dva) centered around a white central fixation dot (diameter: 0.16 dva). The  
477 dots of each aperture had a density of 12.33 dots/dva<sup>2</sup>. All dots had a lifetime of 9  
478 frames and were repositioned randomly within their field once they died. If the dots  
479 moved beyond the edge of their field, they were moved back by 1 field width. The  
480 position of a given dot at the beginning of each block was determined randomly as  
481 was the time a dot had already lived.

482 In the *global horizontal* condition, the dots in all apertures moved synchronously  
483 according to a horizontal sine wave ( $A = 1.31$  dva,  $f = 0.5$  Hz,  $\omega = 3.14$ ,  $\phi = 0$ ;  
484 [Figure 4, B.](#)). In the *local vertical* condition, they followed an identical but verti-  
485 cal sine wave with the dots in the bottom-right and top-left apertures moving anti-  
486 synchronously ( $\phi_1 = 0$ ) relative to the dots in the top-right and bottom-left aper-  
487 tures ( $\phi_2 = \pi$ ; [Figure 4, A.](#), and [Inline Supplementary Video 3](#)). The horizontal  
488 condition mimicked the perceived movement during the global diamond percept and  
489 enabled participants to group the 4 apertures together through the Gestalt principle  
490 of common fate similar to the diamond stimulus. The vertical condition mirrored the  
491 perceived movement during the local no-diamond percept. Notably, the number of  
492 apertures and shape information remained the same in both conditions.

493 *4.1.4. Procedure*

494 The dots experiment comprised 8 experimental runs. Excluding the initial dummy  
495 interval (10 s without fixation dot), each run was split into 8 blocks. Within each  
496 block, a fixation interval (15 s) was presented followed by the dots stimulus (30 s)  
497 in either the vertical or horizontal condition. Within each run, the horizontal and  
498 vertical conditions were presented in an alternating fashion, starting with the vertical  
499 condition in uneven-numbered and the horizontal condition in even-numbered runs.  
500 At the end of each run, a final fixation interval (15 s) was displayed.

501 Participants were required to fixate the fixation dot continuously. In the dots  
502 interval, they indicated whenever the dots in one of the circular apertures flickered  
503 shortly (by changing their color to background gray for 200 ms) via pressing a key

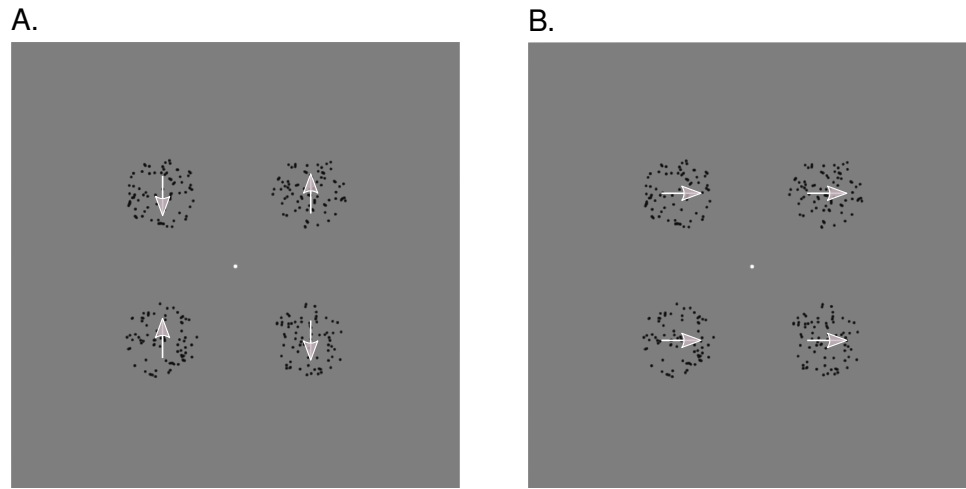

**Figure 4. Dots experiment** Example frames of the dots stimulus. **A.** Local, vertical condition. Here, the dots oscillated vertically and incoherently with the dots in the left/right apertures moving towards/away from one another, respectively, or vice versa (not shown), so that the apertures were perceived as 4 individual elements. **B.** Global, horizontal condition. Here, the dots in all apertures oscillated horizontally and coherently, so that the apertures could be grouped together into a global Gestalt without forming a hybrid shape. Since this stimulus was non-ambiguous, the gray arrows naturally indicate the perceived and physical movement direction of the dots within the aperture.

504 with their right index finger (left apertures) or right middle finger (right apertures).  
505 The number of flicker events per block was determined randomly but was always 3,  
506 6, or 9 with a gap of at least 200 ms between consecutive flicker events. The aperture  
507 within which the flicker events occurred was determined randomly. Participants' eye  
508 position and pupil size were recorded at 60 Hz.

#### 509 4.1.5. MRI acquisition

510 The MRI acquisition was as in the retinotopic mapping and diamond experiment.

#### 511 4.1.6. Preprocessing

512 The preprocessing was identical to the retinotopic mapping and diamond exper-  
513 iment. It is of note, however, that P7 moved more than other participants during  
514 the dots experiment. Moreover, for this participant, coregistration in the retinotopic  
515 experiment was also less ideal than for others. It is thus important to perform any  
516 analyses with and without this participant.

#### 517 4.1.7. Data analysis

518 *Searchlight back-projection.* The searchlight back-projection analysis was conducted  
519 in the same manner as in the diamond experiment with exceptions as follows. The

520 voxel-wise GLM on the preprocessed data (HPF: 185 s) involved a constant epoch  
521 boxcar regressor for each condition (horizontal or vertical) and an event-related re-  
522 gressor for the onset of the flicker events. We calculated the following contrasts of  
523 interest: *horizontal vs fixation*, *vertical vs fixation*, and *horizontal vs vertical*. The  
524 contrasts horizontal or vertical vs fixation were equivalent to the contrasts diamond  
525 or no-diamond vs fixation, respectively. The contrast horizontal vs vertical mirrored  
526 the contrast diamond vs no-diamond.

527 *Representational similarity of searchlight back-projections.* The representational sim-  
528 ilarity analysis was conducted as in the diamond experiment.

## 529 4.2. Results

### 530 4.2.1. Searchlight back-projections

531 **Figure 5** shows the back-projected searchlight-based profiles pooled across partic-  
532 ipants for each visual area and contrast of interest. When comparing the horizontal  
533 or vertical condition to fixation, there was enhanced activity in areas carrying the  
534 RDKs. This pattern was spatially relatively precise in V1 with suppressive effects in  
535 the central and peripheral visual field, and became more wide-spread in V2, V3, and  
536 the VLOC.

537 For the direct comparison between the horizontal and vertical condition, we ob-  
538 served a fairly wide-spread deactivation across the whole visual field in all visual areas,  
539 occasionally intermixed with fairly focal opposite effects. These diffuse suppressive  
540 effects were particularly eminent around the central visual field and stimulated areas  
541 but not in the background area.

### 542 4.2.2. Representational similarity of searchlight back-projections

543 **Figure 6** illustrates the NMDS solution for the dissimilarities between the individ-  
544 ual, pooled, and LOSO searchlight back-projections per contrast of interest and visual  
545 area. Supplementary **Figure S4** shows the corresponding representational dissimilarity  
546 matrices.

547 The LOSO back-projections generally accorded well with the pooled ones, high-  
548 lighting a low degree of dissimilarity. As such, the pooled back-projections do not seem  
549 to be driven by single participants including P7 who moved more than other partic-  
550 ipants and for whom coregistration was difficult. The individual back-projections  
551 clustered circularly around the pooled ones, albeit less closely than the LOSO back-  
552 projections, indicating a higher degree of dissimilarity. This was particularly eminent  
553 for the contrast horizontal vs vertical in V1 and the VLOC (see all **Figure 6**). As  
554 the representational dissimilarity matrices indicate (Supplementary **Figure S4**), this  
555 pattern highlights the highly idiosyncratic nature of the individual back-projections.

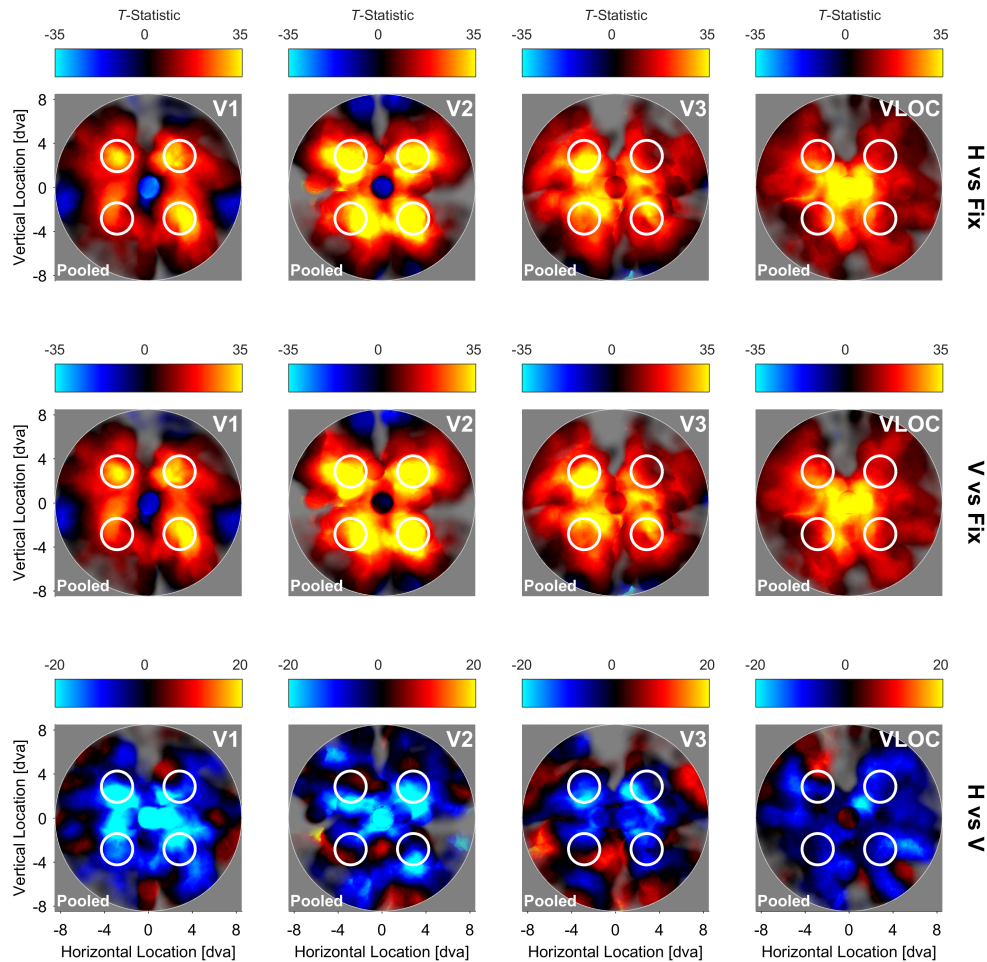

**Figure 5. Dots experiment** | Searchlight back-projections of differential brain activity as a function of contrast of interest and visual area.  $T$ -statistics surpassing a value of  $\pm 35$  (first and second row) or  $\pm 20$  (third row) were set to that value. The saturation of colors reflects the number of vertices in a given searchlight plus their inverse distance from the searchlight center. White lines represent the spatial extent of the circular apertures carrying the RDK. H = Global, horizontal condition. V = Local, vertical condition. Fix = Fixation baseline. VLOC = Ventral-and-lateral occipital complex. Pooled = Data pooled across all 5 participants. RDK = Random dot kinematogram.

### 556 4.3. Discussion

557 Here, we investigated between- and within-area response amplitude mechanisms  
 558 related to the perception of a global Gestalt in an attempt to generalize the findings of  
 559 our diamond experiment beyond shape perception. Participants viewed four apertures  
 560 carrying random dots that moved either vertically and incoherently (local, vertical

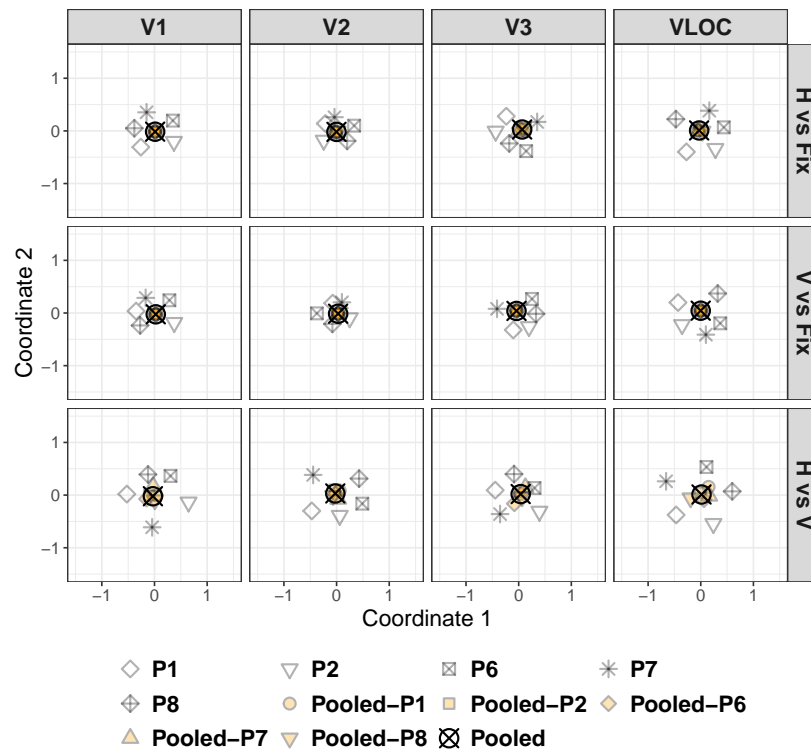

**Figure 6. Dots experiment** | Non-metric multi-dimensional scaling of the dissimilarities from Figure S4 as a function of contrast and visual area. H = Global, horizontal condition. V = Local, vertical condition. Fix = Fixation baseline. VLOC = Ventral-and-lateral occipital complex. P1-P2 and P6-P8 = Participant 1-2 and 6-8. Pooled = Data pooled across all 5 participants. Pooled-P1-Pooled-P2 and Pooled-P6-Pooled-P8 = Data pooled across 4 participants with 1 participant left out (as indicated by the suffix). LOSO = Leave-one-subject-out.

561 condition) or horizontally and coherently, allowing perceptual grouping into a global  
 562 configuration (global, horizontal condition). These conditions echoed the global-local  
 563 aspects of the diamond stimulus without varying in shape information. We hypoth-  
 564 esized that if the between-area response amplitude mechanism between lower visual  
 565 cortex and VLOC/LOC we and others observed (Fang et al., 2008; Grassi et al., 2018;  
 566 Murray et al., 2002) indeed mediates global object perception per se, we should be  
 567 able to conceptually replicate this relationship.

568 To validate our analysis procedures, we compared the horizontal or vertical condi-  
 569 tion to fixation. Our searchlight back-projections highlighted increased differential  
 570 activity in physically stimulated sites and suppressive effects in non-stimulated sites.  
 571 The spatial precision of this pattern was relatively high in V1 and decreased from  
 572 V2 over V3 to the VLOC. Collectively, these results are in line with our diamond  
 573 experiment and confirm the spatial sensitivity of our back-projection approach.

574 To generalize the findings of our diamond experiment, we compared the horizontal  
575 and vertical condition directly, revealing a diffuse pattern of suppressed differential  
576 activity across large portions of the visual field in all visual areas. The wide-spread  
577 deactivation in lower visual cortex is consistent with our previous diamond results.  
578 The diffuse deactivation in the VLOC, however, contradicts the idea that its previ-  
579 ously established inverse relationship to lower visual cortex represents a between-area  
580 response amplitude mechanism mediating global object perception beyond shape per-  
581 ception.

582 An interesting additional finding is that V1 and V2 activity in the more peripheral  
583 back-ground area did not seem to be strongly suppressed for the horizontal relative  
584 to the vertical condition, but showed a tendency to remain unchanged or slightly  
585 enhanced. This could suggest that the dampening effects we observed are diffusely  
586 related to the stimulus and level out further in the periphery. Alternatively, this  
587 may be related to a comparably sparser distribution of pRFs in the background area  
588 along with a fairly large size and central presentation of the dots stimulus and thus  
589 relative undersampling of the background area. Consequently, the question arises  
590 as to whether the large-scale deactivation in lower visual cortex also occurs if the  
591 dots stimulus is smaller, e.g., confined to one visual field quadrant only. Critically, if  
592 this were not the case and the deactivation quadrant-specific and not present in the  
593 remaining visual field, this could be regarded as a diffuse instantiation of a within-area  
594 response amplitude mechanism. In our fourth experiment, we therefore essentially  
595 repeated the dots experiment, but moved the dots stimulus to the top-right visual  
596 field quadrant.

## 597 **5. Dots quadrant experiment**

### 598 *5.1. Methods*

#### 599 *5.1.1. Participants*

600 The author SS and 4 other healthy participants (P1, P6, and P9-P11; 1 male; age  
601 range: 20-36 years; all right-handed) participated in this experiment.

#### 602 *5.1.2. Apparatus*

603 All apparatus were identical to the dots experiment.

#### 604 *5.1.3. Stimuli*

605 The dots quadrant stimulus was identical to the dots stimulus except that the  
606 stimulus configuration was smaller and repositioned. Specifically, the dots field sub-  
607 tended  $0.58 \times 0.58$  dva and the diameter of the circular apertures was thus 0.58 dva.  
608 The aperture midpoints were centered around the corners of a square with a size of  
609  $2.27 \times 2.27$  dva. The dots configuration was always presented in the top-right visual

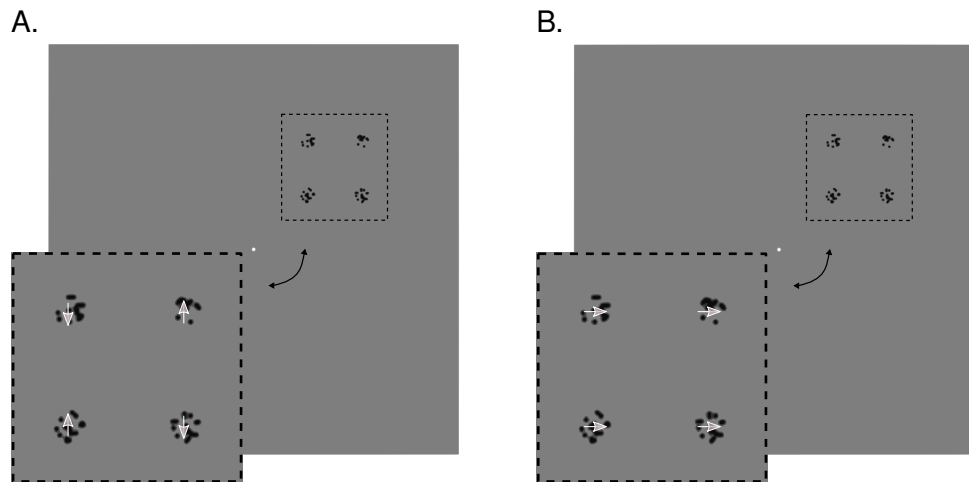

**Figure 7. Dots quadrant experiment** | Example frames of the dots quadrant stimulus. **A.** Local, vertical condition. Here, the dots oscillated vertically and incoherently with the dots in the leftmost/rightmost apertures moving towards/away from one another, respectively, or vice versa (not shown), so that the apertures were perceived as 4 individual elements. **B.** Global, horizontal condition. Here, the dots in all apertures oscillated horizontally and coherently, so that the apertures could be grouped together into a global Gestalt without forming a hybrid shape. Since this stimulus was non-ambiguous, the gray arrows naturally indicate the perceived and physical movement direction of the dots within the aperture. The dots quadrant stimulus was only presented in the top-right visual field quadrant. For reasons of visibility, we cut out the stimulus region to provide a zoomed-in view, as indicated by the black dashed lines and the black double-headed arrows.

610 field quadrant. Its midpoint was located at a distance of 3.41 dva in the x- and y-  
611 direction from the center of the screen. The density of the dots in each aperture was  
612  $60.31/\text{dva}^2$  and thus higher than in the dots experiment. This way, we ensured that  
613 the movement of the dots was still clearly perceivable. As in the dots experiment,  
614 there was a local *vertical* (Figure 7, A.) and global *horizontal* condition (Figure 7, B.,  
615 and Inline Supplementary Video 4).

#### 616 5.1.4. Procedure

617 The procedure of the dots quadrant experiment was the same as for the dots ex-  
618 periment, although here, participants were required to press their right index/middle  
619 finger when the dots of any of the leftmost/rightmost apertures flickered.

#### 620 5.1.5. MRI acquisition

621 The MRI acquisition was identical to the other experiments except that we addi-  
622 tionally collected a rapid MPRAGE (TR = 1.150 s, TE = 3.6 ms, voxel size = 2 mm  
623 isotropic, flip angle =  $7^\circ$ , FoV = 256 mm  $\times$  208 mm, matrix size = 128  $\times$  104, 80  
624 sagittal slices) to aid coregistration of the functional to the structural images if the

625 structural image was acquired in a separate session.

#### 626 *5.1.6. Preprocessing*

627 The preprocessing was identical to all other experiments. However, if rerunning  
628 automated coregistration after manual registration failed, we performed a 2-pass-  
629 procedure where the functional images were first coregistered to the short MPRAGE  
630 and then to the long MPRAGE. Where necessary, this 2-pass-procedure was also  
631 applied to the retinotopic mapping data of a given participant.

#### 632 *5.1.7. Data analysis*

##### 633 *Searchlight back-projections and representational similarity of searchlight back-projections.*

634 The searchlight back-projection and representational similarity analysis were con-  
635 ducted in the same manner as in the dots experiment.

#### 636 *5.2. Results*

##### 637 *5.2.1. Searchlight back-projections*

638 [Figure 8](#) depicts the searchlight back-projection profiles for the pooled data as  
639 a function of visual area and contrast of interest. When contrasting the horizontal  
640 or vertical condition to fixation, our back-projection profiles highlighted enhanced  
641 activity in stimulated visual field portions. This differential enhancement was confined  
642 to the top-right visual field quadrant in V1 and V2 with suppressive effects in the  
643 remaining quadrants, but increasingly extended into the top-left and bottom-right  
644 quadrants from V3 to the VLOC.

645 For the contrast horizontal vs vertical, we observed a tendency for suppressive  
646 effects in stimulated areas of V1 and V2 and enhanced effects in the remaining visual  
647 field. In V3 and the VLOC, this pattern was much more pronounced and wide-spread.

##### 648 *5.2.2. Representational similarity of searchlight back-projections*

649 [Figure 9](#) shows the NMDS solution for the dissimilarities calculated between the  
650 individual, pooled, and LOSO searchlight back-projections by contrast of interest and  
651 visual area. The corresponding representational dissimilarity matrices can be found  
652 in Supplementary [Figure S5](#).

653 In virtually all cases, the LOSO back-projections coincided well with the pooled  
654 ones, suggesting a low degree of dissimilarity and thus speaking against an overly  
655 strong influence of single participants. The individual back-projections tended to  
656 cluster circularly around the pooled ones, albeit less tightly than the LOSO back-  
657 projections, highlighting a higher degree of dissimilarity. However, some individ-  
658 ual back-projections were located far apart from one another or the pooled back-  
659 projections. This was particularly true for the contrast horizontal vs vertical in V1  
660 and the VLOC (see all [Figure 9](#)). As confirmed by the representational dissimilarity



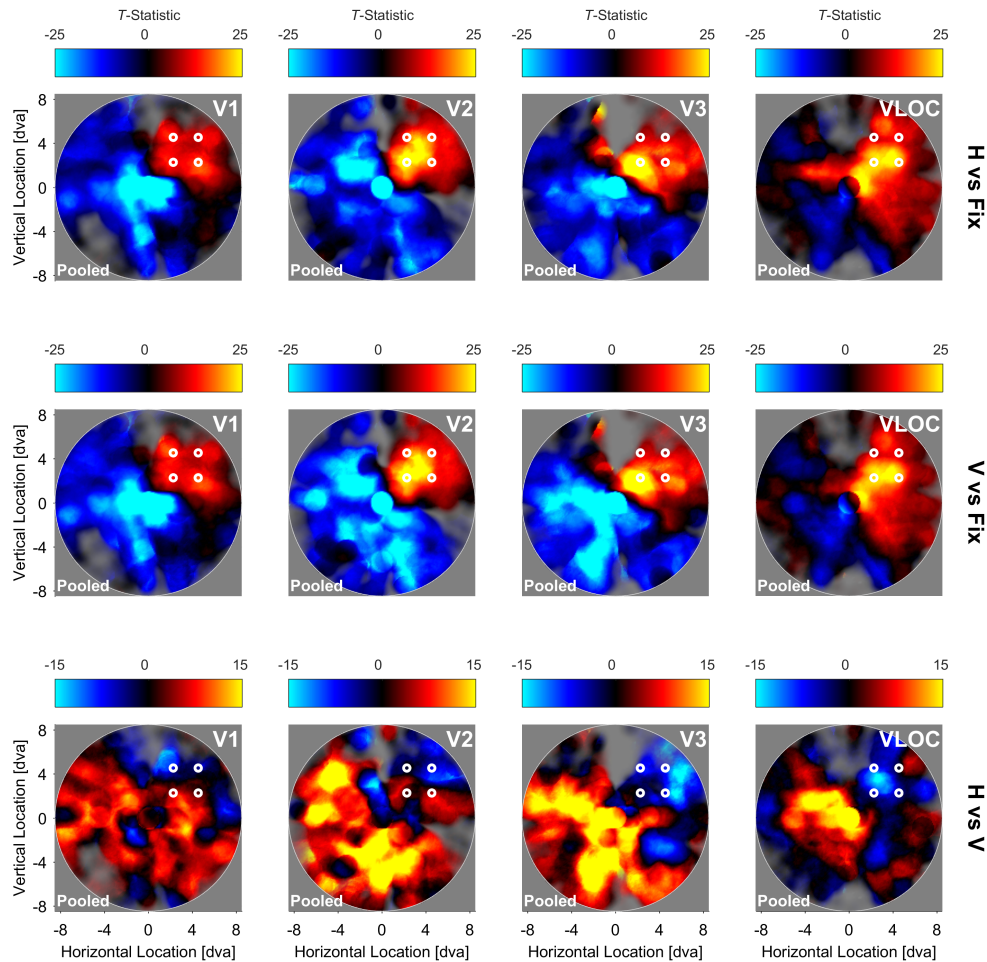

**Figure 8. Dots quadrant experiment** | Searchlight back-projections of differential brain activity as a function of contrast of interest and visual area.  $T$ -statistics surpassing a value of  $\pm 25$  (first and second row) or  $\pm 15$  (third row) were set to that value. The saturation of colors reflects the number of vertices in a given searchlight plus their inverse distance from the searchlight center. White lines represent the spatial extent of the circular apertures carrying the RDK. H = Global, horizontal condition. V = Local, vertical condition. Fix = Fixation baseline. VLOC = Ventral-and-lateral occipital complex. Pooled = Data pooled across all 5 participants. RDK = Random dot kinematogram.

661 matrices (Supplementary [Figure S5](#)), this structure is indicative of a fairly high degree  
 662 of dissimilarity and with that inter-individual variability.

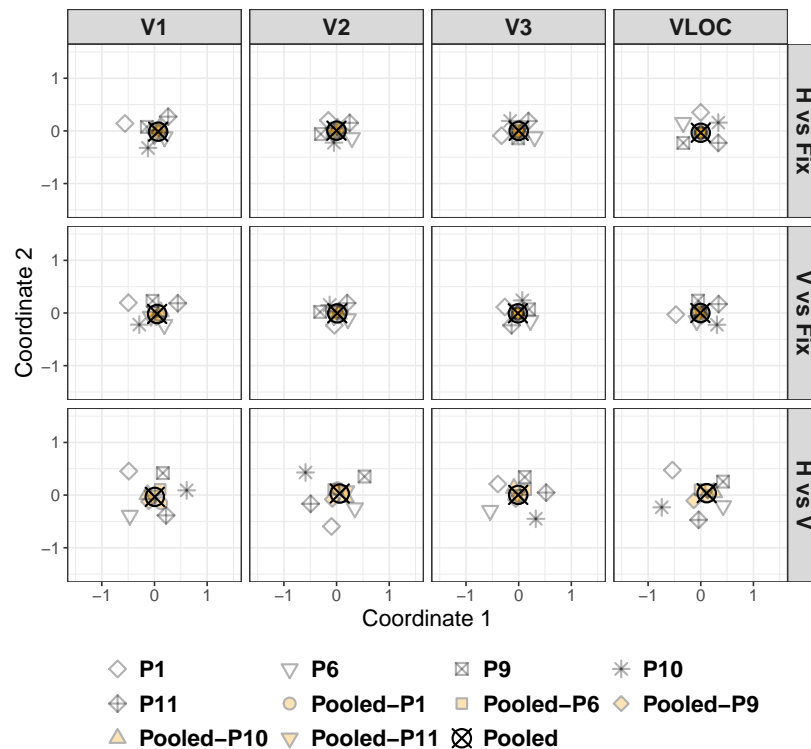

**Figure 9. Dots quadrant experiment** | Non-metric multi-dimensional scaling of the dissimilarities from Figure S5 as a function of contrast of interest and visual area. H = Global, horizontal condition. V = Local, vertical condition. Fix = Fixation baseline. VLOC = Ventral-and-lateral occipital complex. P1, P6, P9-P11 = Participant 1, 6, and 9-11. Pooled = Data pooled across all 5 participants. Pooled-P1, Pooled-P6, Pooled-P9-Pooled-P11 = Data pooled across 4 participants with 1 participant left out (as indicated by the suffix). LOSO = Leave-one-subject-out.

### 663 5.3. Discussion

664 Here, we tested for a diffuse instantiation of a within-area response amplitude  
 665 mechanism related to parafoveal Gestalt perception. Participants viewed apertures  
 666 filled with random dots in the top-right visual field quadrant. The dots moved either  
 667 vertically and incoherently (local, vertical condition) or horizontally and coherently  
 668 (global, horizontal condition). Based on the results of our dots experiment, we hy-  
 669 pothesized that any suppression of activity might be diffusely related to the physical  
 670 stimulus and thus the top-right visual field quadrant or bordering areas.

671 In line with our hypothesis, when contrasting the horizontal to the vertical con-  
 672 dition, our searchlight back-projections revealed a trend for a reduction of activity  
 673 near the stimulus location in V1 and V2 – a pattern that became more pronounced  
 674 and wide-spread in V3 and the VLOC. Moreover, we observed an increase of activity  
 675 in the remaining visual field in all visual areas. We therefore found evidence for a

676 within-area enhancement-suppression mechanism mediating the perception of figure  
677 and ground, as previously established in macaques (Chen et al., 2014; Gilad et al.,  
678 2013; Gilad & Slovin, 2015; Lamme, 1995; Poort et al., 2012, 2016) and humans  
679 (Grassi et al., 2017; Kok & de Lange, 2014; Likova & Tyler, 2008).

680 The absence of clear suppressive effects in V1 and V2 (as compared to V3 and  
681 the VLOC) might be related to the functional architecture of the visual cortex, noisy  
682 voxels, and the size of the dots quadrant stimulus. Specifically, in lower visual areas,  
683 pRFs are smaller and with that the number of pRFs encoding the physical stimu-  
684 lus tendentially reduced (although not necessarily), resulting in diminished response  
685 gain. Consequently, noisy voxels are likely to have a more pronounced impact on  
686 searchlight-wise response amplitude quantifications. Moreover, stimulus-driven ac-  
687 tivity modulations tend to be weaker for smaller and more eccentric stimuli (Nasr  
688 et al., 2015) and the distribution of pRFs sparser in the peripheral visual field, as  
689 qualified by the saturation weighting in our searchlight back-projections. This might  
690 have additionally contributed to the unclear patterns in V1 and V2. Nevertheless,  
691 our validation analyses showed that when contrasting the vertical or horizontal condi-  
692 tion to fixation, we were able to effectively stimulate the cortical area corresponding  
693 to the top-right visual field quadrant. This confirms the general feasibility of our  
694 back-projection approach.

## 695 **6. General discussion**

696 In three experiments, we used dynamic bistable (diamond experiment) and non-  
697 ambiguous stimuli (dots and dots quadrant experiment) to explore within- and between-  
698 area response amplitude mechanisms underlying global object perception in human  
699 visual cortex. All these stimuli could either be perceived globally (i.e., as a grouped  
700 and coherently moving Gestalt) or locally (i.e., as ungrouped and incoherently moving  
701 elements).

### 702 *6.1. Signatures in lower visual cortex*

703 When contrasting global to local perception, our diamond and dots experiment  
704 revealed a fairly wide-spread suppression of activity across the whole visual field in  
705 lower visual cortex. However, unlike our diamond experiment, our dots experiment  
706 provided little evidence for pronounced activity modulations in the background region,  
707 suggesting that these suppressive effects might be diffusely related to the physical  
708 stimulus. Our dots quadrant experiment largely confirmed this notion, but revealed  
709 additionally a wide-spread increase of activity in the background area. Whereas the  
710 wide-spread suppressive effects from the diamond experiment speak against a within-  
711 area response amplitude mechanism mediating global object perception, the results  
712 from the dots and dots quadrant experiment are largely compatible with this idea.

713 In any case, the outcomes of our experiments seem to converge in that they suggest  
714 that perceptual grouping results in a reduction of activity in lower visual cortex.

715 Surprisingly, however, all these findings are at odds with recent evidence showing  
716 a decrease of brain activity in the background and stimulus region of another bistable  
717 global-local stimulus along with an increase in the center and inferred contour region  
718 for global vs local perception ([Grassi et al., 2017](#)). Unlike our diamond stimulus,  
719 this bistable stimulus triggers a local percept of four individually rotating disk pairs  
720 or a global percept of two floating squares circling around the stimulus center. The  
721 mismatch in findings might therefore be related to differences in physical stimulus  
722 properties, such as the type and/or direction of motion (i.e., rotary vs oscillatory and  
723 rotational vs horizontal/vertical, respectively).

724 The emergence of suppressive effects in the dots and dots quadrant experiment,  
725 where shape information was kept constant during global and local perception, further  
726 highlights the importance of motion properties. This idea is in line with findings of  
727 reduced activity in lower visual cortex for coherent vs incoherent motion ([Braddick  
728 et al., 2001](#); [Costagli et al., 2014](#); [Harrison et al., 2007](#); [McKeefry et al., 1997](#); [Schindler  
729 & Bartels, 2017](#)), although no or opposite effects have also occasionally been observed  
730 ([Braddick et al., 2001](#); [Rees et al., 2000](#)). However, unlike these studies on motion  
731 coherence, we did not compare coherent to random motion nor did [Grassi et al. \(2017\)](#).  
732 Rather, all our stimuli always comprised coherent motion, but were either perceived as  
733 ungrouped and moving out-of-phase (local) or grouped and moving in-phase (global).  
734 Accordingly, although speculative, the perceived axis of motion (horizontal vs vertical)  
735 might constitute an important factor driving our results.

736 A potential reason for a horizontal-vertical imbalance might be that there is a  
737 bias for vertical motion in lower visual cortex resulting in generally higher response  
738 amplitudes. In the case of the diamond experiment (in particular), this directional  
739 anisotropy might additionally interact with feature-based attention. Specifically,  
740 given that information about motion direction is inherently ambiguous for the di-  
741 amond stimulus, during the local diamond state, observers may direct their attention  
742 to vertical motion and during the global diamond state to horizontal motion.

743 Interestingly, there is evidence for increased responses to horizontal/vertical motion  
744 around the horizontal/vertical meridian in lower visual cortex ([Clifford et al.,  
745 2009](#)). Along with a plethora of similar studies ([Maloney et al., 2014](#); [Raemaekers  
746 et al., 2009](#); [Schellekens et al., 2013](#)), this finding points to a radial response bias.  
747 Importantly, such a radial anisotropy is incompatible with our results, as it would  
748 produce meridian-related antagonistic effects for global as compared to local per-  
749 ception (i.e., an increase in differential activity around the horizontal meridian and  
750 decrease around the vertical meridian), which we did not observe. Critically, how-  
751 ever, it is hitherto not clear in how far these radial anisotropies are due to vignetting

752 (Roth et al., 2018) and/or aperture-inward biases (Wang et al., 2014), leaving open  
753 the possibility for a vertical-horizontal anisotropy.

754 The role of feature-based attention as a perceptual modulator fits in with evidence  
755 that the attended direction of motion can be decoded from activity in lower visual  
756 cortex (Kamitani & Tong, 2006) even in the absence of direct physical stimulation  
757 (Serences & Boynton, 2007) and the idea that feature-based attention acts fairly  
758 globally across the visual field (Jehee et al., 2011; Maunsell & Treue, 2006; Saenz  
759 et al., 2002; Serences & Boynton, 2007; Treue & Martinez Trujillo, 1999). Strikingly,  
760 the combinatory effect of anisotropies and feature-based attention might also help  
761 explain why variations of the diamond stimulus triggering a local percept of vertical  
762 motion and a global percept of rotational motion (Caclin et al., 2012) or other bistable  
763 global-local stimuli (Grassi et al., 2017) produce distinct differential response profiles.  
764 Most importantly, as for our findings, this combinatory effect leads to the prediction  
765 that rotating the diamond display by 90 degree should produce the opposite pattern  
766 of results for global vs local perception.

767 Leaving all inconsistencies aside, our study overlaps with studies on motion coher-  
768 ence (Braddick et al., 2001; Costagli et al., 2014; Harrison et al., 2007; McKeefry et al.,  
769 1997; Schindler & Bartels, 2017) and Grassi et al.'s (2017) work in that it points to  
770 *stimulus-referred* suppressive effects for global vs local perception. This suppression  
771 might be related to a recently reported phenomenon known as the *global slow-down*  
772 *effect* (Kohler et al., 2009, 2014). This effect comprises a slow-down in the perceived  
773 speed of a stimulus configuration as a result of perceptual grouping and has hitherto  
774 only been demonstrated behaviourally (Kohler et al., 2009, 2014) for variations of the  
775 stimulus used by Grassi et al. (2017). As such, it would be worthwhile to examine  
776 whether the effect holds true for the diamond stimulus and ultimately also our dots  
777 and dots quadrant stimuli along with more conventional motion displays because these  
778 stimulus classes abstract from shape perception (for a similar point and a discussion  
779 on potential underlying mechanisms see Kohler et al., 2014).

780 The broad background enhancement we observed in the dots quadrant experiment,  
781 which was absent in the diamond and dots experiment, might be due to spatial atten-  
782 tion. In particular, perceiving a grouped and coherently moving object parafoveally  
783 might require fewer attentional resources than perceiving an ungrouped and incoher-  
784 ently moving object. Accordingly, in the vertical condition, fewer attentional resources  
785 might have been available for processing the background area. This interpretation fits  
786 in with reports that spatial attention results in increased brain responses even in the  
787 absence of physical stimulation (Kastner et al., 1999; Silver et al., 2009). Due to  
788 the size and central presentation of the diamond and dots stimulus, we might have  
789 been unable to observe similar effects in the diamond and dots experiment. It is  
790 furthermore possible that the background enhancement is related to *perceived back-*

791 *ground luminance*, which has recently been found to be increased for global vs local  
792 perception (Han & VanRullen, 2016, 2017).

793 Building upon previous research involving the diamond stimulus (De-Wit et al.,  
794 2012), it is important to highlight that our results in lower visual cortex across all ex-  
795 periments contradict suggestions of predictive coding theories that suppressive effects  
796 should be confined to cortical sites encoding the physical stimulus and accompanied  
797 by unchanged activity in the background region (e.g., Mumford, 1992; Murray et al.,  
798 2004; Rao & Ballard, 1999). They furthermore conflict with alternative accounts,  
799 such as *response sharpening* (e.g., Kersten et al., 2004; Kersten & Yuille, 2003; Mur-  
800 ray et al., 2004). Response sharpening accounts assume that predictive feedback from  
801 higher-tier areas sharpens diffuse responses in lower-tier areas (due to noise or am-  
802 biguity) by increasing activity matching the global interpretation of the bottom-up  
803 input and decreasing non-matching activity. Accordingly, when contrasting global to  
804 local object perception, activity should increase in stimulated and decrease in non-  
805 stimulated sites – a pattern we did not observe.

## 806 6.2. Relationship between higher and lower visual cortex

807 Whereas our findings for the VLOC in the dots and dots quadrant experiment  
808 largely paralleled those in lower visual cortex for global vs local perception, we ob-  
809 served a large-scale response enhancement in the diamond experiment that was an-  
810 tagonistic to responses in lower visual cortex. The absence of an inverse relationship  
811 between lower visual cortex and the VLOC when shape information did not change  
812 suggests that this between-area response amplitude code does not represent a generic  
813 grouping mechanism acting beyond shape perception.

814 It could be argued that our failure to find evidence for such an opposite pattern is  
815 due to the fact that non-ambiguous stimuli strongly favor a single perceptual interpre-  
816 tation and thus involve less predictive feedback (Wang et al., 2013). This explanation  
817 seems unlikely because an inverse V1-LOC relationship has also been established  
818 for non-ambiguous shape-like stimuli vs unstructured displays (Murray et al., 2002).  
819 Moreover, at least broadly in line with our results, recent studies (Grassi et al., 2016,  
820 2018) found no evidence for the involvement of the LOC when a dynamic, bistable  
821 global-local stimulus constantly triggered shape-based interpretations (i.e., moving  
822 disks forming large squares or small circles).

823 The absence of a (stimulus-related) increase in VLOC activity in the dots and  
824 dots quadrant experiment seems incompatible with a study reporting enhanced LOC  
825 activity for intact compared to scattered objects with disturbed inter-part relations  
826 (Margalit et al., 2017). Yet, in this study, inter-part relations were abolished by  
827 disturbing the contiguity of different shape parts. In our experiments, however, the  
828 position of the apertures did not change during the local state nor did shape infor-  
829 mation, which might explain the discrepant results.

### 830 *6.3. Inter-individual variability*

831 The wealth of evidence presented here is based on data pooled across a small  
832 number of participants. As such, it is important to flag an overly large influence of  
833 a single participant. Although the results of our representational similarity analyses  
834 did not indicate such a bias, they collectively highlighted the idiosyncratic nature of  
835 the individual back-projection profiles. Some of these idiosyncrasies are likely due  
836 to a lower signal-to-noise ratio at the individual level triggered by a generally lower  
837 number of available data points. They might also be related to inter-individual vari-  
838 ability in pRF estimates and processing of the global-local stimuli, such as differences  
839 in switch rates, perceptual durations (Supplementary material, 1.1.2 Results, and  
840 Supplementary [Figure S2](#)), perceptual vividness, and attention allocation.

## 841 **7. Conclusion**

842 We found evidence for a suppression of activity in lower visual cortex accompanied  
843 by an increase of activity in the VLOC for global relative to local object perception.  
844 While the suppressive effects in lower visual cortex manifested themselves irrespective  
845 of shape grouping, this was not the case for the enhanced responses in the VLOC.  
846 Instead, once shape perception was held constant during both global and local object  
847 perception, the VLOC also showed a decrease of activity. As such, the inverse rela-  
848 tionship between lower visual cortex and the VLOC we initially quantified cannot be  
849 regarded as a generic grouping mechanism. We furthermore observed that grouping-  
850 related suppressive effects can be diffusely confined to stimulated visual field portions  
851 (once stimulus size is reduced) and surrounded by enhancement effects, potentially  
852 pointing to a within-area response amplitude mechanism mediating the perception of  
853 figure and ground.

## 854 **8. Data and code availability**

855 Preprocessed data, analysis code, and stimulus videos are available from [https:](https://doi.org/10.17605/OSF.IO/E6C8S)  
856 [//doi.org/10.17605/OSF.IO/E6C8S](https://doi.org/10.17605/OSF.IO/E6C8S).

## 857 **9. Conflict of interest**

858 The authors declare no conflict of interest. The research sponsor had no role in the  
859 study design, the collection, analysis and interpretation of the data or the write-up  
860 and decision to submit this article for peer review.

## 861 10. Acknowledgements

862 This research was supported by a European Research Council Starting Grant to  
863 DSS (WMOSPOTWU, 310829). We thank Elisa Infanti and Man-Ling Ho for their  
864 help with data collection, Samuel G. Solomon and Matteo Lisi for useful discussions,  
865 and all participants for taking part in our study. Some of the reports here were part  
866 of an unpublished MSc thesis.

## 867 Supplementary material

### 868 1. Supplementary methods and results

#### 869 1.1. Diamond experiment

##### 870 1.1.1. Data analysis

871 *Perceptual durations.* Participants' key presses were used to calculate the durations of  
872 the diamond and no-diamond percept. If the same key was pressed multiple times in  
873 succession, the resulting sub-durations were summed up. The period from the onset  
874 of the diamond display until participants' first key press was discarded. For each  
875 participant and the data pooled across participants, we then fit the durations for the  
876 diamond and no-diamond percept with a two-parameter ( $\alpha$ : shape,  $\beta$ : rate) gamma  
877 probability density function using the maximum likelihood method. The resulting fits  
878 were superimposed onto a density histogram of the perceptual durations (bin width:  
879 2 s).

##### 880 1.1.2. Results

881 *Perceptual durations.* The probability density histograms of the durations per per-  
882 ceptual state for each participant and the pooled data with superimposed gamma fit  
883 can be found in Supplementary [Figure S2](#). Despite inter-individual variability in the  
884 shape and rate parameters, both the pooled and individual diamond and no-diamond  
885 durations seem to be well fit with a gamma distribution, suggesting they follow sim-  
886 ilar temporal dynamics. However, all participants except P2 showed a tendentially  
887 higher probability density of longer durations for the no-diamond relative to the dia-  
888 mond percept. Likewise, these participants showed a higher median duration for the  
889 no-diamond percept and spent a higher proportion of time in this perceptual state,  
890 which was also reflected in the pooled results. Consequently, the perception of most  
891 participants was slightly biased towards the no-diamond state.

### 892 2. Supplementary figures and tables



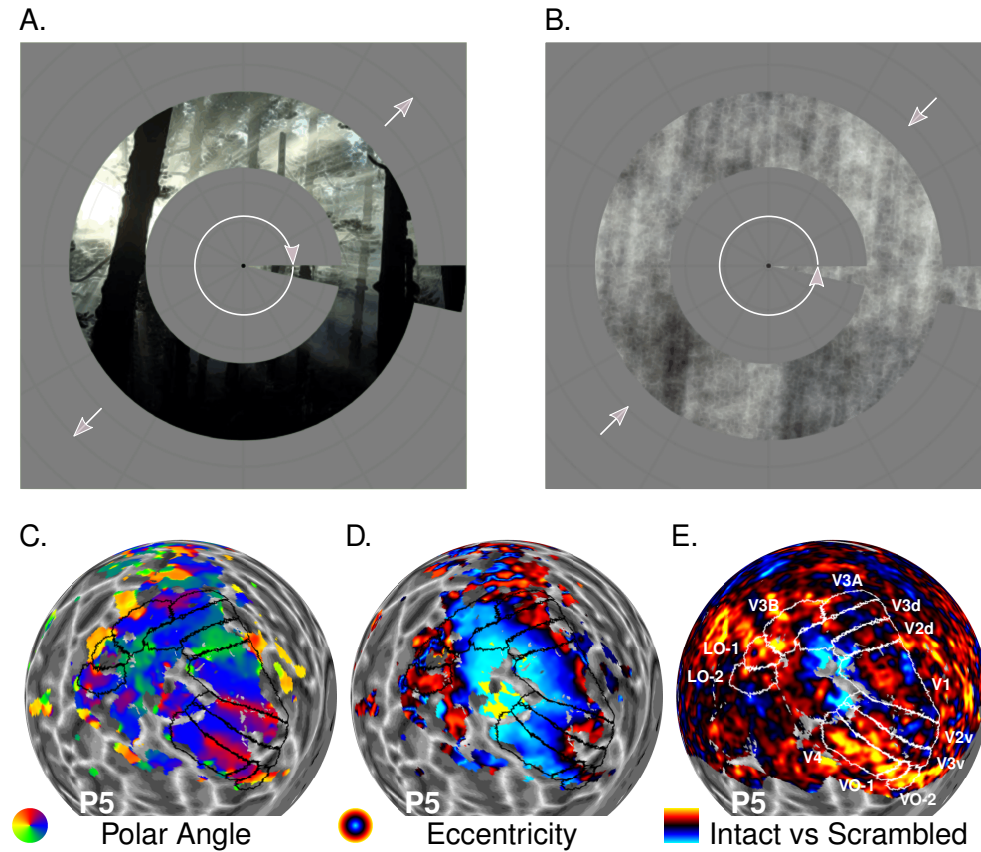

**Figure S1. Retinotopic mapping experiment** | Example frames of the wedge-and-ring stimulus and smooth cortical maps of P5's left hemisphere projected onto a spherical surface model. **A.** Intact, colorful carrier pattern. **B.** Phase-scrambled version of the carrier pattern in A. The gray arrows indicate the movement direction of the wedge-and-ring aperture, which was either clockwise and expanding (A.), counterclockwise and contracting (B.), clockwise and contracting, or counterclockwise and expanding (not shown, respectively). **C.** Polar angle map. **D.** Eccentricity map. Vertices surpassing an eccentricity of 15 dva were discarded (no other post-smoothing thresholding was applied). Note that these pRF maps were subjected to the experiment-specific smoothing procedure (see 3.1.7 Data analysis). The color disks represent the color schemes used to label different visual field portions. **E.** Differential brain activity resulting from contrasting periods of intact vs phase-scrambled images. Differential betas surpassing a value of  $\pm 2$  were set to that value. Cold colors reflect negative and warm colors positive differential beta values as indicated by the color bar. White or black lines denote the boundaries between visual areas. The gray scale pattern of the surface model reflects the cortical curvature. Darker regions depict sulci and lighter regions gyri. P5 = Participant 5. VO = Ventral-occipital area. LO = Lateral-occipital area. PRF = Population receptive field.

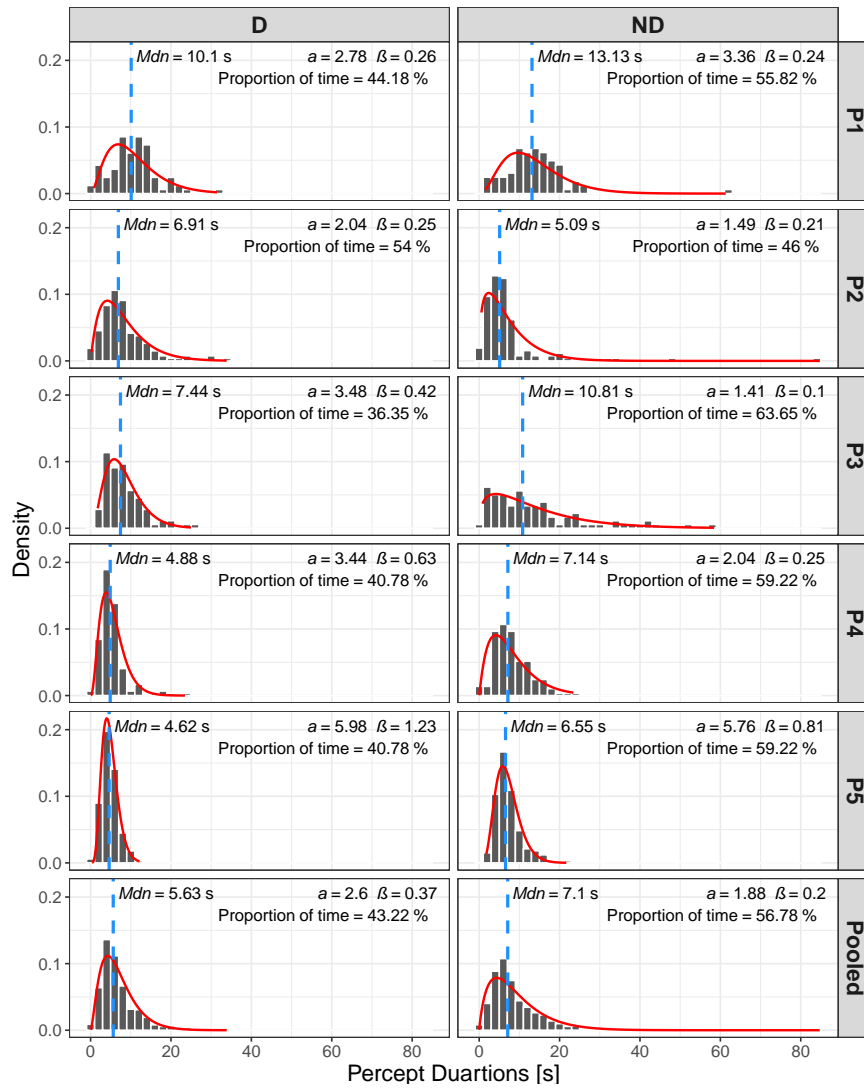

**Figure S2. Diamond experiment** | Probability density histograms of the durations corresponding to the diamond and no-diamond percept with superimposed gamma functions. The red line depicts the fitted gamma curve and the blue line the median duration.  $\alpha$ ,  $\beta$  = Shape and rate parameter of the gamma distribution, respectively. Total time = Proportion of time spent in the respective perceptual state. D = Global, diamond percept. ND = Local, no-diamond percept. P1-P5 = Participant 1-5. Pooled = Data pooled across all 5 participants.

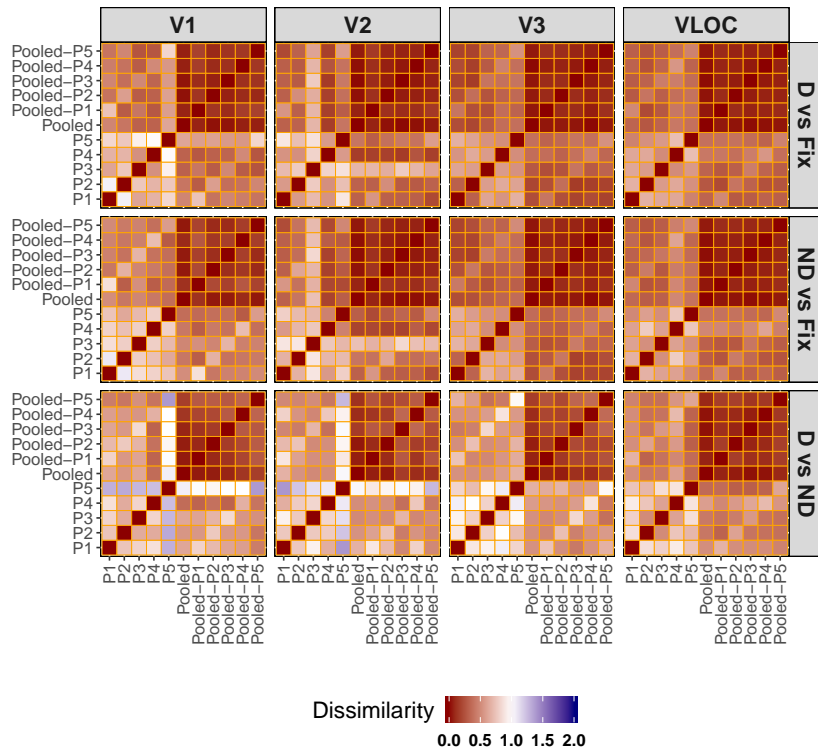

**Figure S3. Diamond experiment** | Representational dissimilarity matrices for the individual, pooled, and LOSO searchlight back-projections as a function of interest and visual area. Dissimilarities were defined as 1-Spearman correlation. D = Global, diamond percept. ND = Local, no-diamond percept. Fix = Fixation baseline. VLOC = Ventral-and-lateral occipital complex. P1-P5 = Participant 1-5. Pooled = Data pooled across all 5 participants. Pooled-P1-Pooled-P5 = Data pooled across 4 participants with 1 participant left out (as indicated by the suffix). LOSO = Leave-one-subject-out.

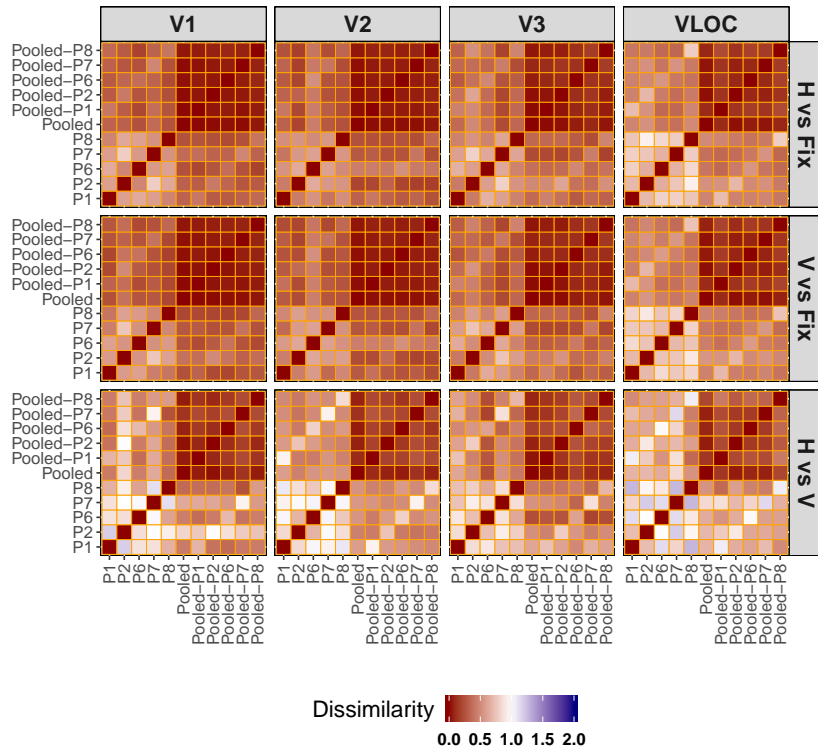

**Figure S4. Dots experiment** | Representational dissimilarity matrices for the individual, pooled, and LOSO searchlight back-projections as a function of contrast of interest and visual area. Dissimilarities were defined as 1-Spearman correlation. H = Global, horizontal condition. V = Local, vertical condition. Fix = Fixation baseline. VLOC = Ventral-and-lateral occipital complex. P1-P2 and P6-P8 = Participant 1-2 and 6-8. Pooled = Data pooled across all 5 participants. Pooled-P1-Pooled-P2 and Pooled-P6-Pooled-P8 = Data pooled across 4 participants with 1 participant left out (as indicated by the suffix). LOSO = Leave-one-subject-out.

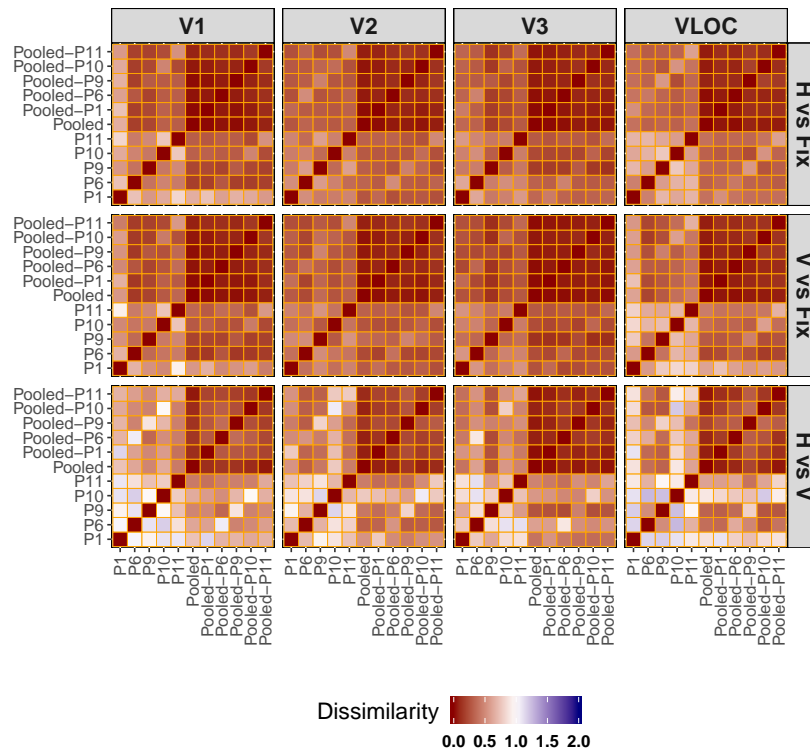

**Figure S5. Dots quadrant experiment** | Representational dissimilarity matrices for the individual, pooled, and LOSO searchlight back-projections as a function of contrast of interest and visual area. Dissimilarities were defined as 1-Spearman correlation. H = Global, horizontal condition. V = Local, vertical condition. Fix = Fixation baseline. VLOC = Ventral-and-lateral occipital complex. P1, P6, P9-P11 = Participant 1, 6, and 9-11. Pooled = Data pooled across all 5 participants. Pooled-P1, Pooled-P6, Pooled-P9-Pooled-P11 = Data pooled across 4 participants with 1 participant left out (as indicated by the suffix). LOSO = Leave-one-subject-out.

*Table S1*  
Software and Toolboxes

| Implemented procedures                         | Software (version)               | Toolbox (version)                                                                                                                                         |
|------------------------------------------------|----------------------------------|-----------------------------------------------------------------------------------------------------------------------------------------------------------|
| Experiments                                    | Matlab R2014a (8.3) <sup>1</sup> | PTB (3.0.11) <sup>4</sup>                                                                                                                                 |
| Preprocessing                                  |                                  |                                                                                                                                                           |
| Realignment/unwarping/coregistration           | Matlab R2016b (9.1) <sup>1</sup> | SPM8 (6313; default parameters) <sup>5</sup>                                                                                                              |
| Surface reconstruction                         | FreeSurfer (5.3.0) <sup>2</sup>  |                                                                                                                                                           |
| Surface projection/detrending/standardization  | Matlab R2016b (9.1) <sup>1</sup> | SamSrf (5.84) <sup>6</sup>                                                                                                                                |
| pRF estimation                                 | Matlab R2016b (9.1) <sup>1</sup> | SamSrf (5.84) <sup>6</sup>                                                                                                                                |
| Delineations                                   | Matlab R2016b (9.1) <sup>1</sup> |                                                                                                                                                           |
| GLM                                            |                                  | SPM8 (6313) <sup>5</sup>                                                                                                                                  |
| Surface projection/manual demarcation          |                                  | SamSrf (5.84) <sup>6</sup>                                                                                                                                |
| Smoothing/visualizations                       |                                  | SamSrf (6.20) <sup>7</sup>                                                                                                                                |
| Searchlight back-projections                   | Matlab R2016b (9.1) <sup>1</sup> |                                                                                                                                                           |
| GLM                                            |                                  | SPM8 (6313) <sup>5</sup>                                                                                                                                  |
| Surface projection                             |                                  | SamSrf (5.84) <sup>6</sup>                                                                                                                                |
| Smoothing/searchlight algorithm/visualizations |                                  | SamSrf (6.20) <sup>7</sup>                                                                                                                                |
| Representational similarity                    |                                  |                                                                                                                                                           |
| Dissimilarity calculation                      | Matlab R2016b (9.1) <sup>1</sup> |                                                                                                                                                           |
| NMDS/visualizations                            | R (3.5.3) <sup>3</sup>           | vegan (2.5-6) <sup>8</sup><br>ggplot2(3.2.1) <sup>9</sup><br>reshape2(1.4.3) <sup>10</sup><br>plyr (1.8.4) <sup>11</sup><br>rmatio (0.14.0) <sup>12</sup> |
| Perceptual durations                           |                                  |                                                                                                                                                           |
| Duration calculation                           | Matlab R2016b (9.1) <sup>1</sup> |                                                                                                                                                           |
| Gamma fitting/visualizations                   | R (3.5.3) <sup>3</sup>           | MASS (7.3-51.4) <sup>13</sup><br>ggplot2 (3.2.1) <sup>9</sup><br>rmatio (0.14.0) <sup>12</sup>                                                            |

Note.<sup>1</sup><https://uk.mathworks.com/>. <sup>2</sup>Dale et al. (1999) and Mendola et al. (1999). <sup>3</sup>R Core Team (2018).  
<sup>4</sup>Brainard (1997), Kleiner et al. (2007), and Pelli (1997). <sup>5</sup><https://www.fil.ion.ucl.ac.uk/spm/software/spm8/>.  
<sup>6</sup><https://doi.org/10.6084/m9.figshare.1344765.v24>. <sup>7</sup><https://osf.io/s3h7w/>. <sup>8</sup>Oksanen et al. (2019).  
<sup>9</sup>Wickham (2016). <sup>10</sup>Wickham (2007). <sup>11</sup>Wickham (2011). <sup>12</sup>Widgren & Hulbert (2019). <sup>13</sup>Kafadar et al. (1999).  
pRF = population receptive field. GLM = General linear model. NMDS = Non-metric multidimensional scaling.  
PTB = Psychtoolbox.

## 893 References

- 894 Altmann, C. F., Bühlhoff, H. H., & Kourtzi, Z. (2003). Perceptual organization of  
895 local elements into global shapes in the human visual cortex. *Curr. Biol.*, *13*,  
896 342–349. doi:[10.1016/S0960-9822\(03\)00052-6](https://doi.org/10.1016/S0960-9822(03)00052-6).
- 897 Alvarez, I., de Haas, B., Clark, C. A., Rees, G., & Samuel Schwarzkopf, D. (2015).  
898 Comparing different stimulus configurations for population receptive field mapping  
899 in human fMRI. *Front. Hum. Neurosci.*, *9*, 96. doi:[10.3389/fnhum.2015.00096](https://doi.org/10.3389/fnhum.2015.00096).
- 900 Amano, K., Wandell, B. A., & Dumoulin, S. O. (2009). Visual field maps, population

- 901 receptive field sizes, and visual field coverage in the human MT+ complex. *J.*  
902 *Neurophysiol.*, *102*, 2704–2718. doi:[10.1152/jn.00102.2009](https://doi.org/10.1152/jn.00102.2009).
- 903 Anderson, B. L., & Sinha, P. (1997). Reciprocal interactions between occlusion and  
904 motion computations. *Proc. Natl. Acad. Sci. U. S. A.*, *94*, 3477–3480. doi:[10.1073/](https://doi.org/10.1073/pnas.94.7.3477)  
905 [pnas.94.7.3477](https://doi.org/10.1073/pnas.94.7.3477).
- 906 Anstis, S., & Kim, J. (2011). Local versus global perception of ambiguous motion  
907 displays. *J. Vis.*, *11*, 13. doi:[10.1167/11.3.13](https://doi.org/10.1167/11.3.13).
- 908 Braddick, O. J., O'Brien, J. M., Wattam-Bell, J., Atkinson, J., Hartley, T., & Turner,  
909 R. (2001). Brain areas sensitive to coherent visual motion. *Perception*, *30*, 61–72.  
910 doi:[10.1068/p3048](https://doi.org/10.1068/p3048).
- 911 Brainard, D. H. (1997). The Psychophysics Toolbox. *Spat. Vis.*, *10*, 433–436. doi:[10.](https://doi.org/10.1163/156856897X00357)  
912 [1163/156856897X00357](https://doi.org/10.1163/156856897X00357). [arXiv:arXiv:1011.1669v3](https://arxiv.org/abs/1011.1669v3).
- 913 Breuer, F. A., Blaimer, M., Heidemann, R. M., Mueller, M. F., Griswold, M. A.,  
914 & Jakob, P. M. (2005). Controlled aliasing in parallel imaging results in higher  
915 acceleration (CAIPIRINHA) for multi-slice imaging. *Magn. Reson. Med.*, *53*, 684–  
916 691. doi:[10.1002/mrm.20401](https://doi.org/10.1002/mrm.20401).
- 917 Caclin, A., Paradis, A. L., Lamirel, C., Thirion, B., Artiges, E., Poline, J. B., &  
918 Lorenceau, J. (2012). Perceptual alternations between unbound moving contours  
919 and bound shape motion engage a ventral/dorsal interplay. *J. Vis.*, *12*, 1–24.  
920 doi:[10.1167/12.7.11](https://doi.org/10.1167/12.7.11).
- 921 Chen, M., Yan, Y., Gong, X., Gilbert, C. D., Liang, H., & Li, W. (2014). Incremen-  
922 tal integration of global contours through interplay between visual cortical areas.  
923 *Neuron*, *82*, 682–694. doi:[10.1016/j.neuron.2014.03.023](https://doi.org/10.1016/j.neuron.2014.03.023).
- 924 Clark, A. (2013). Whatever next? Predictive brains, situated agents, and the  
925 future of cognitive science. *Behav. Brain Sci.*, *36*, 181–204. doi:[10.1017/](https://doi.org/10.1017/S0140525X12000477)  
926 [S0140525X12000477](https://doi.org/10.1017/S0140525X12000477).
- 927 Clifford, C. W. G., Mannion, D. J., & McDonald, J. S. (2009). Radial biases in  
928 the processing of motion and motion-defined contours by human visual cortex. *J.*  
929 *Neurophysiol.*, *102*, 2974–2981. doi:[10.1152/jn.00411.2009](https://doi.org/10.1152/jn.00411.2009).
- 930 Costagli, M., Ueno, K., Sun, P., Gardner, J. L., Wan, X., Ricciardi, E., Pietrini,  
931 P., Tanaka, K., & Cheng, K. (2014). Functional signalers of changes in visual  
932 stimuli: Cortical responses to increments and decrements in motion coherence.  
933 *Cereb. Cortex*, *24*, 110–118. doi:[10.1093/cercor/bhs294](https://doi.org/10.1093/cercor/bhs294).

- 934 Dale, A. M., Fischl, B., & Sereno, M. I. (1999). Cortical surface-based analysis - I.  
935 Segmentation and surface reconstruction. *Neuroimage*, *9*, 179–194. doi:[10.1006/  
936 ning.1998.0395](https://doi.org/10.1006/ning.1998.0395).
- 937 De-Wit, L. H., Kubilius, J., Wagemans, J., & Op de Beeck, H. P. (2012). Bistable  
938 Gestalts reduce activity in the whole of V1, not just the retinotopically predicted  
939 parts. *J. Vis.*, *12*, 12–12. doi:[10.1167/12.11.12](https://doi.org/10.1167/12.11.12).
- 940 van Dijk, J. A., de Haas, B., Moutsiana, C., & Schwarzkopf, D. S. (2016). Interses-  
941 sion reliability of population receptive field estimates. *Neuroimage*, *143*, 293–303.  
942 doi:[10.1016/j.neuroimage.2016.09.013](https://doi.org/10.1016/j.neuroimage.2016.09.013).
- 943 Dumoulin, S. O., & Hess, R. F. (2006). Modulation of V1 activity by shape: Image-  
944 statistics or shape-based perception? *J. Neurophysiol.*, *95*, 3654–3664. doi:[10.  
945 1152/jn.01156.2005](https://doi.org/10.1152/jn.01156.2005).
- 946 Dumoulin, S. O., & Wandell, B. A. (2008). Population receptive field estimates in  
947 human visual cortex. *Neuroimage*, *39*, 647–660. doi:[10.1016/j.neuroimage.2007.  
948 09.034](https://doi.org/10.1016/j.neuroimage.2007.09.034).
- 949 Engel, S. A., Glover, G. H., & Wandell, B. A. (1997). Retinotopic organization in  
950 human visual cortex and the spatial precision of functional MRI. *Cereb. Cortex*,  
951 *7*, 181–192. doi:[10.1093/cercor/7.2.181](https://doi.org/10.1093/cercor/7.2.181).
- 952 Fang, F., Kersten, D., & Murray, S. O. (2008). Perceptual grouping and inverse fMRI  
953 activity patterns in human visual cortex. *J. Vis.*, *8*, 2. doi:[10.1167/8.7.2](https://doi.org/10.1167/8.7.2).
- 954 Fracasso, A., Luijten, P. R., Dumoulin, S. O., & Petridou, N. (2018). Laminar imaging  
955 of positive and negative BOLD in human visual cortex at 7 T. *Neuroimage*, *164*,  
956 100–111. doi:[10.1016/j.neuroimage.2017.02.038](https://doi.org/10.1016/j.neuroimage.2017.02.038).
- 957 Gilad, A., Meirovithz, E., & Slovin, H. (2013). Population responses to contour inte-  
958 gration: Early encoding of discrete elements and late perceptual grouping. *Neuron*,  
959 *78*, 389–402. doi:[10.1016/j.neuron.2013.02.013](https://doi.org/10.1016/j.neuron.2013.02.013).
- 960 Gilad, A., & Slovin, H. (2015). Population responses in V1 encode different fig-  
961 ures by response amplitude. *J. Neurosci.*, *35*, 6335–6349. doi:[10.1523/JNEUROSCI.  
962 0971-14.2015](https://doi.org/10.1523/JNEUROSCI.0971-14.2015).
- 963 Goense, J., Merkle, H., & Logothetis, N. K. (2012). High-resolution fMRI reveals  
964 laminar differences in neurovascular coupling between positive and negative BOLD  
965 responses. *Neuron*, *76*, 629–639. doi:[10.1016/j.neuron.2012.09.019](https://doi.org/10.1016/j.neuron.2012.09.019).
- 966 Grassi, P. R., Zaretskaya, N., & Bartels, A. (2016). Parietal cortex mediates per-  
967 ceptual Gestalt grouping independent of stimulus size. *Neuroimage*, *133*, 367–377.  
968 doi:[10.1016/j.neuroimage.2016.03.008](https://doi.org/10.1016/j.neuroimage.2016.03.008).



- 969 Grassi, P. R., Zaretskaya, N., & Bartels, A. (2017). Scene segmentation in early  
970 visual cortex during suppression of ventral stream regions. *Neuroimage*, *146*, 71–  
971 80. doi:[10.1016/j.neuroimage.2016.11.024](https://doi.org/10.1016/j.neuroimage.2016.11.024).
- 972 Grassi, P. R., Zaretskaya, N., & Bartels, A. (2018). A generic mechanism for percep-  
973 tual organization in the parietal cortex. *J. Neurosci.*, *38*, 0436–18. doi:[10.1523/  
974 JNEUROSCI.0436-18.2018](https://doi.org/10.1523/JNEUROSCI.0436-18.2018).
- 975 Grill-Spector, K., Kushnir, T., Edelman, S., Avidan, G., Itzhak, Y., & Malach, R.  
976 (1999). Differential processing of objects under various viewing conditions in the hu-  
977 man lateral occipital complex. *Neuron*, *24*, 187–203. doi:[10.1016/S0896-6273\(00\)  
978 80832-6](https://doi.org/10.1016/S0896-6273(00)80832-6).
- 979 Grill-Spector, K., Kushnir, T., Hendler, T., Edelman, S., Itzhak, Y., & Malach, R.  
980 (1998). A sequence of object processing stages revealed by fMRI in the human  
981 occipital lobe. *Hum. Brain Mapp.*, *6*, 316–328.
- 982 Grinband, J., Wager, T. D., Lindquist, M., Ferrera, V. P., & Hirsch, J. (2008). De-  
983 tection of time-varying signals in event-related fMRI designs. *Neuroimage*, *43*,  
984 509–520. doi:[10.1016/j.neuroimage.2008.07.065](https://doi.org/10.1016/j.neuroimage.2008.07.065).
- 985 Han, B., & VanRullen, R. (2016). Shape perception enhances perceived contrast:  
986 Evidence for excitatory predictive feedback? *Sci. Rep.*, *6*, 1–10. doi:[10.1038/  
987 srep22944](https://doi.org/10.1038/srep22944).
- 988 Han, B., & VanRullen, R. (2017). The rhythms of predictive coding? Pre-stimulus  
989 phase modulates the influence of shape perception on luminance judgments. *Sci.  
990 Rep.*, *7*, 1–10. doi:[10.1038/srep43573](https://doi.org/10.1038/srep43573).
- 991 Harrison, L. M., Stephan, K. E., Rees, G., & Friston, K. J. (2007). Extra-classical  
992 receptive field effects measured in striate cortex with fMRI. *Neuroimage*, *34*, 1199–  
993 1208. doi:[10.1016/j.neuroimage.2006.10.017](https://doi.org/10.1016/j.neuroimage.2006.10.017).
- 994 Hegdé, J., Fang, F., Murray, S. O., & Kersten, D. (2008). Preferential responses to  
995 occluded objects in the human visual cortex. *J. Vis.*, *8*, 16. doi:[10.1167/8.4.16](https://doi.org/10.1167/8.4.16).
- 996 Houtkamp, P. R. R. & R. (2011). Incremental grouping of image elements in vision.  
997 *Atten Percept Psychophys*, *4*, 95–99. doi:[10.3758/s13414-011-0200-0](https://doi.org/10.3758/s13414-011-0200-0).
- 998 Jehee, J. F. M., Brady, D. K., & Tong, F. (2011). Attention improves encoding of  
999 task-relevant features in the human visual cortex. *J. Neurosci.*, *31*, 8210–8219.  
1000 doi:[10.1523/jneurosci.6153-09.2011](https://doi.org/10.1523/jneurosci.6153-09.2011).
- 1001 Kafadar, K., Koehler, J. R., Venables, W. N., & Ripley, B. D. (1999). Modern applied  
1002 statistics with S. *Am. Stat.*, *53*, 86. doi:[10.2307/2685660](https://doi.org/10.2307/2685660).

- 1003 Kamitani, Y., & Tong, F. (2006). Decoding seen and attended motion directions from  
1004 activity in the human visual cortex. *Curr. Biol.*, *16*, 1096–1102. doi:[10.1016/j.  
1005 cub.2006.04.003](https://doi.org/10.1016/j.cub.2006.04.003).
- 1006 Kastner, S., Pinsk, M. A., De Weerd, P., Desimone, R., & Ungerleider, L. G. (1999).  
1007 Increased activity in human visual cortex during directed attention in the absence of  
1008 visual stimulation. *Neuron*, *22*, 751–761. doi:[10.1016/S0896-6273\(00\)80734-5](https://doi.org/10.1016/S0896-6273(00)80734-5).
- 1009 Kersten, D., Mamassian, P., & Yuille, A. (2004). Object perception as Bayesian  
1010 inference. *Annu. Rev. Psychol.*, *55*, 271–304. doi:[10.1146/annurev.psych.55.  
1011 090902.142005](https://doi.org/10.1146/annurev.psych.55.090902.142005).
- 1012 Kersten, D., & Yuille, A. (2003). Bayesian models of object perception. *Curr. Opin.  
1013 Neurobiol.*, *13*, 150–158. doi:[10.1016/S0959-4388\(03\)00042-4](https://doi.org/10.1016/S0959-4388(03)00042-4).
- 1014 Kleiner, M., Brainard, D. H., Pelli, D. G., Broussard, C., Wolf, T., & Niehorster, D.  
1015 (2007). What's new in Psychtoolbox-3? *Perception*, *36*, S14. doi:[10.1068/v070821](https://doi.org/10.1068/v070821).
- 1016 Kohler, P. J., Caplovitz, G. P., & Tse, P. U. (2009). The whole moves less than the  
1017 spin of its parts. *Attention, Perception, Psychophys.*, *71*, 675–679. doi:[10.3758/  
1018 APP.71.4.675](https://doi.org/10.3758/APP.71.4.675).
- 1019 Kohler, P. J., Caplovitz, G. P., & Tse, P. U. (2014). The global slowdown effect:  
1020 Why does perceptual grouping reduce perceived speed? *Attention, Perception,  
1021 Psychophys.*, *76*, 780–792. doi:[10.3758/s13414-013-0607-x](https://doi.org/10.3758/s13414-013-0607-x).
- 1022 Kok, P., & de Lange, F. P. (2014). Shape perception simultaneously up- and down-  
1023 regulates neural activity in the primary visual cortex. *Curr. Biol.*, *24*, 1531–1535.  
1024 doi:[10.1016/j.cub.2014.05.042](https://doi.org/10.1016/j.cub.2014.05.042).
- 1025 Kriegeskorte, N. (2008). Representational similarity analysis – Connecting the  
1026 branches of systems neuroscience. *Front. Syst. Neurosci.*, *2*, 1–28. doi:[10.3389/  
1027 neuro.06.004.2008](https://doi.org/10.3389/neuro.06.004.2008).
- 1028 Kruskal, J. B. (1964a). Multidimensional scaling by optimizing goodness of fit to a  
1029 nonmetric hypothesis. *Psychometrika*, *29*, 1–27. doi:[10.1007/BF02289565](https://doi.org/10.1007/BF02289565).
- 1030 Kruskal, J. B. (1964b). Nonmetric multidimensional scaling: A numerical method.  
1031 *Psychometrika*, *29*, 115–129. doi:[10.1007/BF02289694](https://doi.org/10.1007/BF02289694).
- 1032 Lamme, V. A. (1995). The neurophysiology of figure-ground segregation in primary  
1033 visual cortex. *J. Neurosci.*, *15*, 1605–1615. doi:[10.1523/jneurosci.15-02-01605.  
1034 1995](https://doi.org/10.1523/jneurosci.15-02-01605.1995).
- 1035 Larsson, J., & Heeger, D. J. (2006). Two retinotopic visual areas in human lateral  
1036 occipital cortex. *J. Neurosci.*, *26*, 13128–13142. doi:[10.1523/JNEUROSCI.1657-06.  
1037 2006](https://doi.org/10.1523/JNEUROSCI.1657-06.2006).

- 1038 Lerner, Y., Harel, M., & Malach, R. (2004). Rapid completion effects in human high-  
1039 order visual areas. *Neuroimage*, *21*, 516–526. doi:[10.1016/j.neuroimage.2003.](https://doi.org/10.1016/j.neuroimage.2003.08.046)  
1040 [08.046](https://doi.org/10.1016/j.neuroimage.2003.08.046).
- 1041 Lerner, Y., Hendler, T., & Malach, R. (2002). Object-completion effects in the human  
1042 lateral occipital complex. *Cereb. Cortex*, *12*, 163–177. doi:[10.1093/cercor/12.2.](https://doi.org/10.1093/cercor/12.2.163)  
1043 [163](https://doi.org/10.1093/cercor/12.2.163).
- 1044 Likova, L. T., & Tyler, C. W. (2008). Occipital network for figure/ground organiza-  
1045 tion. *Exp. Brain Res.*, *189*, 257–267. doi:[10.1007/s00221-008-1417-6](https://doi.org/10.1007/s00221-008-1417-6).
- 1046 Lorenceau, J., & Shiffrar, M. (1992). The influence of terminators on motion integra-  
1047 tion across space. *Vision Res.*, *32*, 263–273. doi:[10.1016/0042-6989\(92\)90137-8](https://doi.org/10.1016/0042-6989(92)90137-8).
- 1048 Malach, R., Reppas, J. B., Benson, R. R., Kwong, K. K., Jiang, H., Kennedy, W. A.,  
1049 Ledden, P. J., Brady, T. J., Rosen, B. R., & Tootell, R. B. (1995). Object-related ac-  
1050 tivity revealed by functional magnetic resonance imaging in human occipital cortex.  
1051 *Proc. Natl. Acad. Sci. U. S. A.*, *92*, 8135–8139. doi:[10.1073/pnas.92.18.8135](https://doi.org/10.1073/pnas.92.18.8135).
- 1052 Maloney, R. T., Watson, T. L., & Clifford, C. W. (2014). Determinants of motion  
1053 response anisotropies in human early visual cortex: The role of configuration and ec-  
1054 centricity. *Neuroimage*, *100*, 564–579. doi:[10.1016/j.neuroimage.2014.06.057](https://doi.org/10.1016/j.neuroimage.2014.06.057).
- 1055 Margalit, E., Biederman, I., Tjan, B. S., & Shah, M. P. (2017). What is actually  
1056 affected by the scrambling of objects when localizing the lateral occipital complex?  
1057 *J. Cogn. Neurosci.*, *29*, 1595–1604. doi:[10.1162/jocn\\_a\\_01144](https://doi.org/10.1162/jocn_a_01144).
- 1058 Maunsell, J. H. R., & Treue, S. (2006). Feature-based attention in visual cortex.  
1059 *Trends Neurosci.*, *29*, 317–322. doi:[10.1016/j.tins.2006.04.001](https://doi.org/10.1016/j.tins.2006.04.001).
- 1060 McKeefry, D. J., Watson, J. D., Frackowiak, R. S., Fong, K., & Zeki, S. (1997). The  
1061 activity in human areas V1/V2, V3, and V5 during the perception of coherent and  
1062 incoherent motion. *Neuroimage*, *5*, 1–12. doi:[10.1006/nimg.1996.0246](https://doi.org/10.1006/nimg.1996.0246).
- 1063 Mendola, J. D., Dale, A. M., Fischl, B., Liu, A. K., & Tootell, R. B. (1999). The  
1064 representation of illusory and real contours in human cortical visual areas revealed  
1065 by functional magnetic resonance imaging. *J. Neurosci.*, *19*, 8560–72. doi:[10.1523/](https://doi.org/10.1523/JNEUROSCI.19-19-08560.1999)  
1066 [JNEUROSCI.19-19-08560.1999](https://doi.org/10.1523/JNEUROSCI.19-19-08560.1999).
- 1067 Moutsiana, C., De Haas, B., Papageorgiou, A., Van Dijk, J. A., Balraj, A., Green-  
1068 wood, J. A., & Schwarzkopf, D. S. (2016). Cortical idiosyncrasies predict the  
1069 perception of object size. *Nat. Commun.*, *7*, 1–12. doi:[10.1038/ncomms12110](https://doi.org/10.1038/ncomms12110).
- 1070 Mumford, D. (1992). On the computational architecture of the neocortex - II The role  
1071 of cortico-cortical loops. *Biol. Cybern.*, *66*, 241–251. doi:[10.1007/BF00198477](https://doi.org/10.1007/BF00198477).

- 1072 Murray, S. O., Kersten, D., Olshausen, B. A., Schrater, P., & Woods, D. L. (2002).  
1073 Shape perception reduces activity in human primary visual cortex. *Proc. Natl.*  
1074 *Acad. Sci. U. S. A.*, *99*, 15164–9. doi:[10.1073/pnas.192579399](https://doi.org/10.1073/pnas.192579399).
- 1075 Murray, S. O., Schrater, P., & Kersten, D. (2004). Perceptual grouping and the  
1076 interactions between visual cortical areas. doi:[10.1016/j.neunet.2004.03.010](https://doi.org/10.1016/j.neunet.2004.03.010).
- 1077 Nasr, S., Stemmann, H., Vanduffel, W., & Tootell, R. B. (2015). Increased visual  
1078 stimulation systematically decreases activity in lateral intermediate cortex. *Cereb.*  
1079 *Cortex*, *25*, 4009–4028. doi:[10.1093/cercor/bhu290](https://doi.org/10.1093/cercor/bhu290).
- 1080 Oksanen, J., Blanchet, F. G., Friendly, M., Kindt, R., Legendre, P., McGlinn, D.,  
1081 Minchin, P. R., O'Hara, R. B., Simpson, G. L., Solymos, P., Stevens, M. H. H.,  
1082 Szoecs, E., & Wagner, H. (2019). Vegan: Community ecology package [Computer  
1083 software].
- 1084 Pelli, D. G. (1997). The VideoToolbox software for visual psychophysics: Transforming  
1085 numbers into movies. *Spat. Vis.*, *10*, 437–442. doi:[10.1163/156856897X00366](https://doi.org/10.1163/156856897X00366).
- 1086 Poort, J., Raudies, F., Wannig, A., Lamme, V. A., Neumann, H., & Roelfsema, P. R.  
1087 (2012). The role of attention in figure-ground segregation in areas V1 and V4 of the  
1088 visual cortex. *Neuron*, *751*. Poort, 143–156. doi:[10.1016/j.neuron.2012.04.032](https://doi.org/10.1016/j.neuron.2012.04.032).
- 1089 Poort, J., Self, M. W., Van Vugt, B., Malkki, H., & Roelfsema, P. R. (2016). Texture  
1090 segregation causes early figure enhancement and later ground suppression in areas  
1091 V1 and V4 of visual cortex. *Cereb. Cortex*, *26*, 3964–3976. doi:[10.1093/cercor/  
1092 bhw235](https://doi.org/10.1093/cercor/bhw235).
- 1093 R Core Team (2018). R: A Language and environment for statistical computing  
1094 [Computer software]. doi:[10.1007/978-3-540-74686-7](https://doi.org/10.1007/978-3-540-74686-7).
- 1095 Raemaekers, M., Lankheet, M. J., Moorman, S., Kourtzi, Z., & Van Wezel, R. J.  
1096 (2009). Directional anisotropy of motion responses in retinotopic cortex. *Hum.*  
1097 *Brain Mapp.*, *30*, 3970–3980. doi:[10.1002/hbm.20822](https://doi.org/10.1002/hbm.20822).
- 1098 Rao, R. P., & Ballard, D. H. (1999). Predictive coding in the visual cortex: A func-  
1099 tional interpretation of some extra-classical receptive-field effects. *Nat. Neurosci.*,  
1100 *2*, 79–87. doi:[10.1038/4580](https://doi.org/10.1038/4580).
- 1101 Rees, G., Friston, K., & Koch, C. (2000). A direct quantitative relationship between  
1102 the functional properties of human and macaque V5. *Nat. Neurosci.*, *3*, 716–723.
- 1103 Roelfsema, P. R. (2006). Cortical algorithms for perceptual grouping. *Annu. Rev.*  
1104 *Neurosci.*, *29*, 203–227. doi:[10.1146/annurev.neuro.29.051605.112939](https://doi.org/10.1146/annurev.neuro.29.051605.112939).

- 1105 Roth, Z. N., Heeger, D. J., & Merriam, E. P. (2018). Stimulus vignetting and orienta-  
1106 tion selectivity in human visual cortex. *Elife*, *7*, 1–19. doi:[10.7554/elife.37241](https://doi.org/10.7554/elife.37241).
- 1107 Saenz, M., Buracas, G. T., & Boynton, G. M. (2002). Global effects of feature-based  
1108 attention in human visual cortex. *Nat. Neurosci.*, *5*, 631–632. doi:[10.1038/nm876](https://doi.org/10.1038/nm876).
- 1109 Schellekens, W., Van Wezel, R. J., Petridou, N., Ramsey, N. F., & Raemaekers, M.  
1110 (2013). Integration of motion responses underlying directional motion anisotropy  
1111 in human early visual cortical areas. *PLoS One*, *8*. doi:[10.1371/journal.pone.](https://doi.org/10.1371/journal.pone.0067468)  
1112 [0067468](https://doi.org/10.1371/journal.pone.0067468).
- 1113 Schindler, A., & Bartels, A. (2017). Connectivity reveals sources of predictive coding  
1114 signals in early visual cortex during processing of visual optic flow. *Cereb. Cortex*,  
1115 *27*, 2885–2893. doi:[10.1093/cercor/bhw136](https://doi.org/10.1093/cercor/bhw136).
- 1116 Scholte, H. S., Jolij, J., Fahrenfort, J. J., & Lamme, V. A. F. (2008). Feedforward and  
1117 recurrent processing in scene segmentation: Electroencephalography and functional  
1118 magnetic resonance imaging. *J. Cogn. Neurosci.*, *20*, 2097–2109. doi:[10.1162/](https://doi.org/10.1162/jocn.2008.20142)  
1119 [jocn.2008.20142](https://doi.org/10.1162/jocn.2008.20142).
- 1120 Seghier, M., Dojat, M., Delon-Martin, C., Rubin, C., Warnking, J., Segebarth, C.,  
1121 & Bullier, J. (2000). Moving illusory contours activate primary visual cortex: An  
1122 fMRI study. *Cereb. Cortex*, *10*, 663–670. doi:[10.1093/cercor/10.7.663](https://doi.org/10.1093/cercor/10.7.663).
- 1123 Serences, J. T., & Boynton, G. M. (2007). Feature-based attentional modulations  
1124 in the absence of direct visual stimulation. *Neuron*, *55*, 301–312. doi:[10.1016/j.](https://doi.org/10.1016/j.neuron.2007.06.015)  
1125 [neuron.2007.06.015](https://doi.org/10.1016/j.neuron.2007.06.015).
- 1126 Sereno, M. I., Dale, A. M., Reppas, J. B., Kwong, K. K., Belliveau, J. W., Brady,  
1127 T. J., Rosen, B. R., & Tootell, R. B. (1995). Borders of multiple visual areas in  
1128 humans revealed by functional magnetic resonance imaging. *Science*, *268*, 889–93.  
1129 doi:[10.1126/science.7754376](https://doi.org/10.1126/science.7754376).
- 1130 Shmuel, A., Augath, M., Oeltermann, A., & Logothetis, N. K. (2006). Negative  
1131 functional MRI response correlates with decreases in neuronal activity in monkey  
1132 visual area V1. *Nat. Neurosci.*, *9*, 569–577. doi:[10.1038/nm1675](https://doi.org/10.1038/nm1675).
- 1133 Shmuel, A., Yacoub, E., Pfeuffer, J., Van de Moortele, P. F., Adriany, G., Hu, X., &  
1134 Ugurbil, K. (2002). Sustained negative BOLD, blood flow and oxygen consumption  
1135 response and its coupling to the positive response in the human brain. *Neuron*, *36*,  
1136 1195–1210. doi:[10.1016/S0896-6273\(02\)01061-9](https://doi.org/10.1016/S0896-6273(02)01061-9).
- 1137 Silver, M., Ress, D., & Heeger, D. J. (2009). Neural correlates of sustained spatial  
1138 attention in human early visual cortex. *J Neurophysiol*, *97*, 1–8. doi:[10.1152/jn.](https://doi.org/10.1152/jn.00677.2006)  
1139 [00677.2006](https://doi.org/10.1152/jn.00677.2006).

- 1140 Treue, S., & Martinez Trujillo, J. C. (1999). Feature-based attention influences motion  
1141 processing gain in macaque visual cortex. *Nature*, *399*, 575–9. doi:[10.1038/21176](https://doi.org/10.1038/21176).
- 1142 Vinberg, J., & Grill-Spector, K. (2008). Representation of shapes, edges, and surfaces  
1143 across multiple cues in the human visual cortex. *J. Neurophysiol.*, *99*, 1380–1393.  
1144 doi:[10.1152/jn.01223.2007](https://doi.org/10.1152/jn.01223.2007).
- 1145 Wandell, B. A., Dumoulin, S. O., & Brewer, A. A. (2007). Visual field maps in human  
1146 cortex. *Neuron*, *56*, 366–383. doi:[10.1016/j.neuron.2007.10.012](https://doi.org/10.1016/j.neuron.2007.10.012).
- 1147 Wang, H. X., Merriam, E. P., Freeman, J., Heeger, D. J., Wang, H. X., Merriam,  
1148 E. P., Heeger, D. J., & Freeman, J. (2014). Motion direction biases and decoding  
1149 in human visual cortex. *J. Neurosci.*, *34*, 12601–12615. doi:[10.1523/JNEUROSCI.](https://doi.org/10.1523/JNEUROSCI.1034-14.2014)  
1150 [1034-14.2014](https://doi.org/10.1523/JNEUROSCI.1034-14.2014).
- 1151 Wang, M., Arteaga, D., & He, B. J. (2013). Brain mechanisms for simple perception  
1152 and bistable perception. *Proc. Natl. Acad. Sci.*, *110*, E3350–E3359. doi:[10.1073/](https://doi.org/10.1073/pnas.1221945110)  
1153 [pnas.1221945110](https://doi.org/10.1073/pnas.1221945110).
- 1154 Wickham, H. (2007). Reshaping data with the reshape package. *J. Stat. Softw.*, *21*,  
1155 1–20. doi:[10.18637/jss.v021.i12](https://doi.org/10.18637/jss.v021.i12).
- 1156 Wickham, H. (2011). The split-apply-combine strategy for data analysis. *J. Stat.*  
1157 *Softw.*, *40*, 1–29. doi:[10.18637/jss.v040.i01](https://doi.org/10.18637/jss.v040.i01).
- 1158 Wickham, H. (2016). *ggplot2: Elegant graphics for data analysis*. New York, NY:  
1159 Springer-Verlag. doi:[10.1007/978-0-387-98141-3](https://doi.org/10.1007/978-0-387-98141-3).
- 1160 Widgren, S., & Hulbert, C. (2019). rmatio: Read and write 'Matlab' files [Computer  
1161 software].
- 1162 Winawer, J., & Witthoft, N. (2015). Human V4 and ventral occipital retinotopic  
1163 maps. *Vis. Neurosci.*, *32*. doi:[10.1017/S0952523815000176](https://doi.org/10.1017/S0952523815000176). [arXiv:15334406](https://arxiv.org/abs/15334406).
